1  
2  
3  
4  
5  
6  
7  
8  
9  
10  
11  
12  
13  
14  
15  
16  
17  
18  
19

**Serine ADP-ribosylation marks nucleosomes for ALC1-dependent chromatin remodeling**

By Jugal Mohapatra<sup>1</sup>, Kyuto Tashiro<sup>1</sup>, Ryan L. Beckner<sup>1</sup>, Jorge Sierra<sup>1</sup>, Jessica A. Kilgore<sup>1,2</sup>,  
Noelle S. Williams<sup>1,2</sup> and Glen Liszczak<sup>1,3,\*</sup>

<sup>1</sup>Department of Biochemistry, University of Texas Southwestern Medical Center, 5323 Harry Hines  
Boulevard, Dallas, TX 75390-9038, USA

<sup>2</sup>Preclinical Pharmacology Core, Department of Biochemistry, University of Texas Southwestern  
Medical Center, 5323 Harry Hines Boulevard, Dallas, TX 75390-9038, USA

<sup>3</sup>Lead contact

\*correspondence: [glen.liszczak@utsouthwestern.edu](mailto:glen.liszczak@utsouthwestern.edu)

20 **Abstract**

21 Serine ADP-ribosylation (ADPr) is a DNA damage-induced post-translational modification  
22 catalyzed by the PARP1/2:HPF1 complex. As the list of PARP1/2:HPF1 substrates continues to  
23 expand, there is a need for technologies to prepare mono- and poly-ADP-ribosylated proteins for  
24 biochemical interrogation. Here we investigate the unique peptide ADPr activities catalyzed by  
25 PARP1 in the absence and presence of HPF1. We then exploit these activities to develop a  
26 method that facilitates installation of ADP-ribose polymers onto full-length proteins with precise  
27 control over chain length and modification site. A series of semi-synthetic ADP-ribosylated histone  
28 proteins are prepared which demonstrate that ADPr at H2BS6 or H3S10 converts nucleosomes  
29 into robust substrates for the chromatin remodeler ALC1. Importantly, we found ALC1 selectively  
30 remodels 'activated' substrates within heterogeneous nucleosome populations and that  
31 nucleosome serine ADPr is sufficient to stimulate ALC1 activity in nuclear extracts. Our study  
32 identifies a biochemical function for nucleosome serine ADPr and describes a method that is  
33 broadly applicable to explore the impact that site-specific serine mono- and poly-ADPr have on  
34 protein function.

## 35 **Introduction**

36 Protein ADP-ribosylation (ADPr) has been implicated in diverse mammalian cellular signaling  
37 pathways(Gupte et al., 2017). In this process, the ADP-ribose moiety from an NAD<sup>+</sup> co-factor is  
38 deposited onto one of several chemically distinct amino acid side chain functionalities(Daniels et  
39 al., 2015). In cells, proteins can be modified with a mono-ADP-ribose adduct or variable length  
40 ADP-ribose polymers that emanate from specific protein sites, a process henceforth referred to as  
41 poly-ADPr. Among the 17-member poly(ADP-ribose) polymerase (PARP) enzyme family, PARP1/2  
42 have emerged as the most extensively studied owing to the success of PARP1/2 inhibitors to treat  
43 DNA repair-deficient cancers(Lord and Ashworth, 2017). As the clinical utility of PARP1/2 inhibitors  
44 continues to expand, it is critical to understand how PARP1/2-dependent ADPr impacts cellular  
45 physiology and disease. In light of intense PARP1/2 substrate identification efforts(Bonfiglio et al.,  
46 2017; Larsen et al., 2018; Leidecker et al., 2016), several creative methods have been developed  
47 to install serine mono-ADPr onto synthetic peptides for biochemical interrogation(Bonfiglio et al.,  
48 2020; Voorneveld et al., 2018; Zhu et al., 2020). However, these technologies have been limited to  
49 relatively short peptide constructs. Additionally, no methods exist to reconstitute well-defined ADP-  
50 ribose chains at specific sites on isolated proteins for functional analysis. Hence, there is a dearth  
51 of mechanistic insight into how specific PARP1/2:HPF1-dependent mono- and poly-ADPr events  
52 regulate protein function.

53

54 Upon binding to single or double-stranded DNA breaks, PARP1/2 undergo conformational changes  
55 that induce the formation of a catalytically competent complex with NAD<sup>+</sup> and the PARP1/2-  
56 interacting protein HPF1(Benjamin and Gill, 1980; Dawicki-McKenna et al., 2015; Gibbs-Seymour  
57 et al., 2016; Langelier et al., 2012; Suskiewicz et al., 2020). It has long been appreciated that DNA  
58 damage-induced ADPr has a profound effect on chromatin architecture through a variety of  
59 proposed mechanisms(Poirier et al., 1982; Ray Chaudhuri and Nussenzweig, 2017; Tulin and

60 Spradling, 2003). Indeed, there are several ATP-dependent chromatin remodeling enzymes that  
61 localize to damage sites in an ADPr-dependent manner and contribute to decompaction of higher  
62 order chromatin structure, ultimately increasing repair factor accessibility(Ahel et al., 2009; Chou et  
63 al., 2010; Luijsterburg et al., 2016; Smeenk et al., 2013). One such chromatin remodeler, ALC1,  
64 harbors a macrodomain module that has been shown to specifically interact with tri-ADP-  
65 ribose(Singh et al., 2017). This binding event relieves an autoinhibited ALC1 conformation and  
66 activates the ATPase domain that powers nucleosome remodeling(Lehmann et al., 2017; Singh et  
67 al., 2017). ALC1 activation via ternary complex formation with auto-ADP-ribosylated PARP1 and  
68 nucleosomes has been extensively studied(Gottschalk et al., 2009; Gottschalk et al., 2012;  
69 Lehmann et al., 2017; Singh et al., 2017), and it has been suggested that other DNA-bound, ADP-  
70 ribosylated proteins may contribute to this process. However, it remains unclear which  
71 PARP1/2:HPF1 substrates and corresponding modification sites can lead to ALC1 activation, and  
72 if any are sufficient to do so in the absence of auto-modified PARP1. Such questions surrounding  
73 ALC1 regulation are increasingly important as recent studies show that abrogating ALC1 activity  
74 vastly increases the efficacy of PARP inhibitors(Blessing et al., 2020; Verma et al., 2021) and may  
75 even be useful for treatment of PARP inhibitor-resistant cancers(Juhasz et al., 2020).

76

77 The core histones H2B and H3 are consistently identified as some of the most abundantly modified  
78 PARP1/2:HPF1 substrates(Bonfiglio et al., 2017; Huletsky et al., 1989; Larsen et al., 2018). While  
79 much effort has been directed towards deciphering the regulatory mechanisms that govern serine  
80 ADPr(Bilokapic et al., 2020; Bonfiglio et al., 2017; Bonfiglio et al., 2020; Gibbs-Seymour et al.,  
81 2016; Palazzo et al., 2018; Suskiewicz et al., 2020), the functional consequences of specific  
82 nucleosome serine ADPr sites remain unclear. We and others have demonstrated that histone  
83 H2B serine 6 (H2BS6) and histone H3 serine 10 (H3S10) are the primary PARP1/2:HPF1 target  
84 sites in biochemical and cellular systems(Liszczyk et al., 2018; Palazzo et al., 2018). Building upon

85 these studies, we sought to determine how mono- and poly-ADPr on H2BS6 and H3S10 contribute  
86 to PARP1/2-dependent DNA repair activities such as ATP-dependent chromatin remodeling.

87

88 Here we employ an HPLC/MS-based analysis to investigate PARP1-dependent peptide ADPr  
89 activity in the absence and presence of HPF1. Reaction analyses guided the development of an  
90 approach that combines peptide chemistry, enzymatic catalysis, and protein ligation technologies  
91 to generate full-length proteins that bear mono- or poly-ADPr at user-defined serine sites. Key to  
92 this method is the separation of two enzyme-based peptide modification steps: 1.) mono-ADPr of  
93 unmodified peptides by the PARP1:HPF1 complex, and 2.) ADP-ribose chain elongation from  
94 mono-ADP-ribosylated peptides by the uncomplexed PARP1 enzyme. We prepare eight unique,  
95 semi-synthetic ADP-ribosylated nucleosomes and demonstrate that histone serine poly-ADPr  
96 marks nucleosomes for ALC1-dependent chromatin remodeling, with ALC1 activation levels of up  
97 to ~370-fold observed relative to unmodified nucleosome substrates. Additional data support a  
98 model wherein nucleosome serine ADPr is sufficient to initiate ALC1-dependent chromatin  
99 structure alterations with a high degree of spatial precision. This study describes a broadly  
100 applicable method to install ADP-ribose chains at specific PARP1/2:HPF1 target sites on peptides  
101 and proteins and identifies a functional output for nucleosome serine ADPr in the DNA damage  
102 response.

103

## 104 **Results**

### 105 ***An HPLC/MS-based approach to analyze peptide ADPr by PARP1:HPF1***

106 While synthetic and enzyme-based methodologies exist to prepare mono-ADP-ribosylated peptide  
107 fragments (Bonfiglio et al., 2020; Voorneveld et al., 2018; Zhu et al., 2020), installation of poly-ADP-  
108 ribose is synthetically more complex and has not been reported. Therefore, we envisioned an  
109 enzyme-based approach that employs the PARP1:HPF1 complex to modify specific serine sites on

110 synthetic peptides with homogenous ADP-ribose polymers. A similar elegant approach was  
 111 recently reported by the Matic group to prepare mono-ADP-ribosylated peptides, which included  
 112 H2B and H3 tail constructs (Bonfiglio et al., 2020). However, in that study, a post-reaction poly-  
 113 ADP-ribose glycohydrolase (PARG) treatment was carried out to reduce any poly-ADP-ribosylated  
 114 species to the mono-ADP-ribose adduct. Our method is unique in that we developed an RP-HPLC-  
 115 MS-based assay to simultaneously monitor recombinant PARP1:HPF1 complex activity on a  
 116 peptide substrate and separate distinct mono- and poly-ADP-ribosylated peptide products (Fig.  
 117 1a).

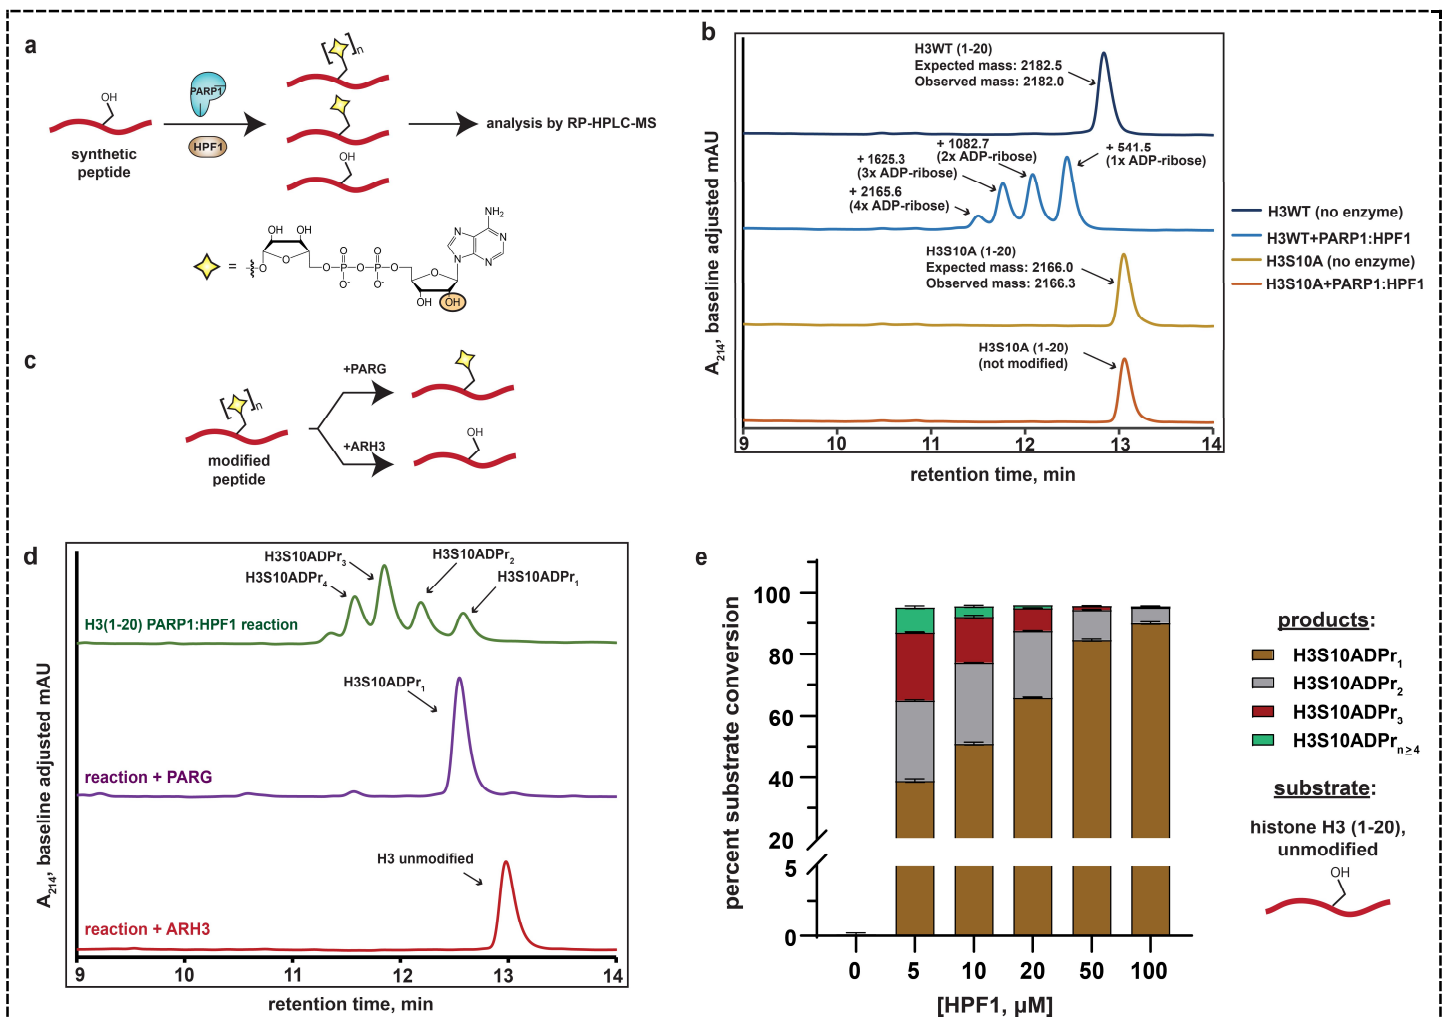

118  
 119 **Fig. 1: Analysis of serine mono- and poly-ADPr by the PARP1:HPF1 complex on synthetic**  
 120 **peptide substrates.**

121 **a**, A schematic showing the workflow employed to analyze peptide poly-ADPr by the recombinant  
122 PARP1:HPF1 complex. Peptide products are separated by polymer length via RP-HPLC. The  
123 yellow star represents a serine-linked ADP-ribose modification, 'n' represents variable polymer  
124 length, and the orange circle indicates the site of linear ADP-ribose polymerization. **b**, RP-HPLC  
125 and MS analysis of substrate peptides (histone H3 wild-type or S10A mutant, amino acids 1-20)  
126 and corresponding PARP1:HPF1 reaction products (for raw MS data, see Supplementary Fig. 1a).  
127 RP-HPLC gradients are from 0-35% Solvent B (2-22 min). **c**, A schematic describing the ADP-  
128 ribosylhydrolase-based characterization strategy. Enzymes and their respective reaction products  
129 are depicted. **d**, RP-HPLC traces from PARG- or ARH3-treated H3 peptide ADPr reactions that  
130 were optimized for ADP-ribose chain elongation. The number of ADP-ribose units was verified by  
131 MS analysis. **e**, Product analysis of a PARP1 ADPr reaction in the presence of increasing HPF1  
132 concentrations. Histone H3 substrate peptide starting material and each unique ADP-ribosylated  
133 product were quantified via HPLC chromatogram peak integration (see Methods and  
134 Supplementary Fig. 1e). The columns represent the percent substrate conversion to each ADP-  
135 ribosylated product. Data are represented as mean  $\pm$  s.d. (n = 3).

136  
137 We began our study by incubating a synthetic histone H3 peptide (amino acids 1-20) that contains  
138 a single known serine target site (H3S10) with the PARP1:HPF1 complex,  $\text{NAD}^+$ , and stimulating  
139 DNA. Multiple H3 peptide product peaks were observed via chromatography-based reaction  
140 analysis. ESI-MS characterization revealed a single, unique mass in each HPLC product peak,  
141 which corresponded to an H3 peptide modified with mono-, di-, tri-, or tetra-ADP-ribose (henceforth  
142  $\text{H3S10ADPr}_n$ ) (Fig. 1b and Supplementary Fig. 1a). Notably, all products are sensitive to the  
143 H3S10A mutation, indicating the presence of an ADP-ribose chain that elongates from the S10 site  
144 (Fig. 1b). Thus, each individual peptide product corresponding to mono-, di-, tri-, or tetra-ADP-  
145 ribosylated H3S10 can be separated via RP-HPLC.

146

147 We next treated ADPr reactions with recombinant ADP-ribosylhydrolase enzymes to validate the  
148 modification site and chemical identity of modified peptide products (Fig. 1c). Analysis via HPLC-  
149 MS demonstrates that PARG(Slade et al., 2011) treatment quantitatively converts all observed  
150 ADP-ribosylated H3 peptide products to the mono-ADP-ribosylated species, which is consistent  
151 with a single modification site (Fig. 1d). When the serine-specific ADP-ribosylhydrolase 3  
152 (ARH3)(Fontana et al., 2017) enzyme is substituted for PARG, all ADP-ribosylated species are  
153 converted to the unmodified H3 peptide, thus confirming a serine-linked modification (Fig. 1d). An  
154 established LC-MS/MS analysis protocol(Chen et al., 2018) was used to determine that the  
155 peptide-linked ADP-ribose chains were principally linear, with negligible branching (< 0.03%)  
156 (Supplementary Fig. 1b).

157

158 The workflow and characterization strategies described here were next implemented to install  
159 ADP-ribose chains at the known PARP1:HPF1 target site on a synthetic H2B peptide (amino acids  
160 1-16). Despite the presence of two serine residues in the H2B peptide, our mutagenesis and ADP-  
161 ribosylhydrolase-based characterizations confirmed H2BS6 as the sole acceptor residue  
162 (Supplementary Fig. 1c and d). Notably, while conversion of up to 1 mM (~20 mg) of unmodified  
163 H2B or H3 peptides to the H2BS6ADPr<sub>1</sub> or H3S10ADPr<sub>1</sub> products could be routinely achieved, a  
164 more scalable approach for peptide poly-ADPr would be required to deploy these molecules in  
165 protein ligation reactions and biochemical assays.

166

167 Analysis of the PARP2:HPF1 structure suggests that HPF1 binding, while required for serine ADPr,  
168 would interfere with the PARP1/2 ADP-ribose chain elongation mechanism(Suskiewicz et al.,  
169 2020). This observation is consistent with several recent reports that show HPF1-dependent  
170 shortening of PARP1/2-catalyzed ADP-ribose chains in cellular and biochemical assays(Bonfiglio



171 et al., 2020; Gibbs-Seymour et al., 2016; Rudolph et al., 2021). We therefore hypothesized that the  
172 concentration of HPF1 in the peptide modification reaction may affect the final distribution of our  
173 mono- and poly-ADP-ribosylated peptide products. To explore this, an HPF1 titration from 5  $\mu$ M to  
174 100  $\mu$ M was performed in an ADPr reaction containing the H3 peptide. Notably, unmodified peptide  
175 starting material and ADP-ribosylated peptide products could be separated via RP-HPLC and  
176 quantified by chromatogram peak integration at A<sub>214</sub> and A<sub>280</sub>, respectively (see Methods for  
177 details). Near quantitative conversion (>95%) of the unmodified H3 substrate to ADP-ribosylated  
178 products was achieved at HPF1 concentrations as low as 5  $\mu$ M (Fig. 1e). Interestingly, we  
179 observed a gradual increase in mono-ADPr activity and decrease in poly-ADPr activity as HPF1 is  
180 titrated into the reaction (Fig. 1e and Supplementary Fig. 1e). In the 5  $\mu$ M HPF1 reaction, the  
181 mono-ADP-ribosylated peptide represents ~41% of the total product, with the remaining ~59%  
182 comprising a distribution of di- to penta-ADP-ribosylated peptide. In the 100  $\mu$ M HPF1 reaction,  
183 mono-ADP-ribosylated peptide increases to ~94% of the total product, with di-ADP-ribose  
184 representing the remaining ~6%. This is consistent with a mechanism wherein PARP1:HPF1  
185 complex formation switches PARP1 activity from an ADP-ribose chain elongator to a mono-ADP-  
186 ribosyltransferase. Indeed, these experimental data are congruent with the structure-based  
187 hypothesis put forth by Suskiewicz, *et al.* that HPF1 limits PARP1/2 activity to mono-ADPr.

### 188 189 ***Synthesis of poly-ADP-ribosylated peptides via two enzymatic steps***

190 Based on the mechanistic interpretation described above, we surmised that PARP1 would display  
191 efficient ADP-ribose chain elongation activity on mono-ADP-ribosylated peptides in the absence of  
192 HPF1 in our reconstituted system. To investigate this, we employed our purified H3S10ADPr<sub>1</sub>  
193 peptide as a substrate in a PARP1 activity assay that lack HPF1 (Fig. 2a). Importantly, we  
194 maintained all reaction conditions, substrate concentrations, and stimulating DNA concentrations  
195 described for the PARP1:HPF1 activity assays. Strikingly, incubation of the H3S10ADPr<sub>1</sub> peptide

196 with PARP1 resulted in robust ADP-ribose chain elongation at all enzyme concentrations tested  
 197 (0.2, 1, and 5  $\mu\text{M}$ ). Nearly 70% conversion of the H3S10ADPr<sub>1</sub> substrate to poly-ADP-ribosylated  
 198 products was achieved at 1  $\mu\text{M}$  PARP1 (Fig. 2b and Supplementary Fig. 2a). The di-, tri-, and  
 199 tetra-ADP-ribosylated species were the most abundant products with yield decreasing precipitously  
 200 for chains greater than four units in length (Supplementary Fig. 2a). Notably, PARP2 also  
 201 catalyzes ADP-ribose chain elongation from the H3S10ADPr<sub>1</sub> substrate and similar polymerization  
 202 activity was observed with both PARP1 and PARP2 on the H2BS6ADPr<sub>1</sub> substrate (Fig. 2b and  
 203 Supplementary Fig. 2b and c).

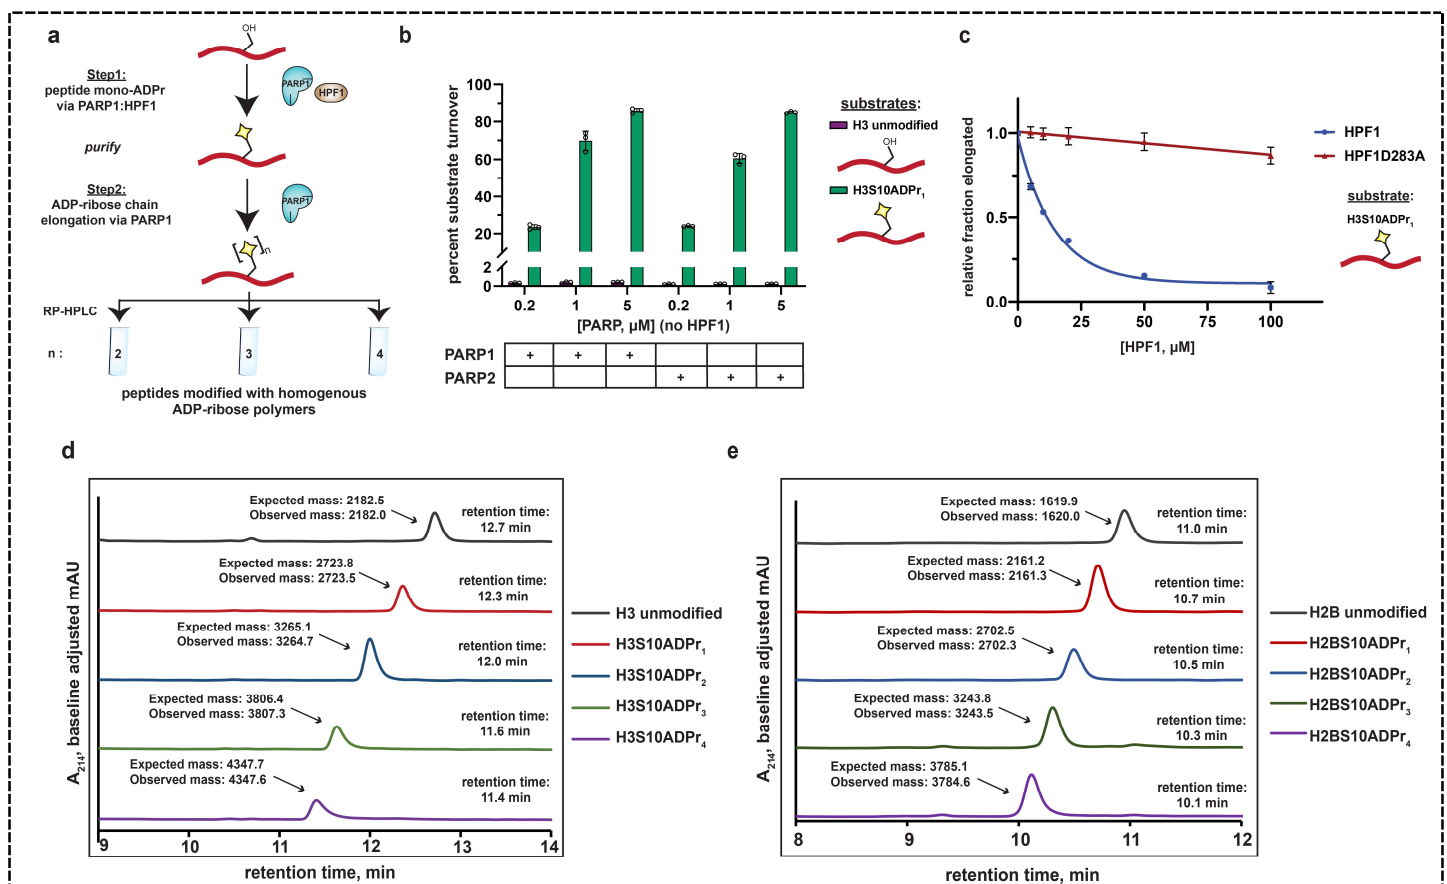

204

205 **Fig. 2: A two-step enzymatic process to prepare poly-ADP-ribosylated peptides with**  
 206 **defined ADP-ribose chain lengths.**

207 **a**, A schematic showing the two-step enzymatic procedure implemented to synthesize and purify  
 208 poly-ADP-ribosylated peptides. The mono-ADP-ribosylated peptide product from Step 1 was

209 purified using preparative RP-HPLC prior to use in Step 2. **b**, Substrate turnover analysis of  
210 PARP1 and PARP2 ADPr reactions in the absence of HPF1. Purple bars represent total percent  
211 turnover of an unmodified H3 peptide to mono- or poly-ADP-ribosylated products. Green bars  
212 represent total percent turnover of the H3S10ADPr<sub>1</sub> peptide to poly-ADP-ribosylated products (for  
213 poly-ADP-ribosylated product distribution, see Supplementary Fig. 2a and b) Data are represented  
214 as mean  $\pm$  s.d. (n = 3). **c**, Analysis of PARP1 elongation activity on the H3S10ADPr<sub>1</sub> peptide  
215 substrate in the presence of increasing amounts of HPF1 or HPF1D283A. Fraction elongated  
216 represents the fraction of H3S10ADPr<sub>1</sub> peptide converted to poly-ADP-ribosylated products. Data  
217 are normalized to fraction of substrate elongated in the absence of HPF1. Data are represented as  
218 mean  $\pm$  s.d. (n = 3). The curves represent the fit of the data into a non-linear regression model for  
219 one-phase exponential decay. **d**, RP-HPLC and MS analysis of mono- and poly-ADP-ribosylated  
220 H3 peptides that have been purified to homogeneity via semi-preparative HPLC. **e**, As in **d**, but for  
221 H2B (amino acids 1-16) peptides.

222  
223 To further characterize the inhibitory effect that HPF1 has on PARP1-dependent ADP-ribose chain  
224 elongation, we incubated PARP1 with the H3S10ADPr<sub>1</sub> substrate peptide in the presence of  
225 increasing concentrations of HPF1. As expected, HPF1 exhibits dose-dependent inhibition of  
226 PARP1-catalyzed ADP-ribose polymerization from the mono-ADP-ribosylated substrate, with 50%  
227 inhibition occurring at  $\sim$ 14  $\mu$ M HPF1 for 1  $\mu$ M PARP1. A binding-deficient HPF1 mutant  
228 (D283A)(Rudolph et al., 2021; Suskiewicz et al., 2020) is unable to appreciably inhibit ADP-ribose  
229 polymerization (Fig. 2c and Supplementary Fig. 2d and e). These data complement our unmodified  
230 peptide substrate:HPF1 titration analysis and provide additional evidence that the PARP1:HPF1  
231 complex is a dedicated mono-ADP-ribosyltransferase.

233 Importantly, by first isolating mono-ADP-ribosylated peptides from a PARP1:HPF1 reaction for use  
234 in a PARP1 elongation reaction, each poly-ADP-ribosylated H2BS6 and H3S10 product (up to four  
235 ADP-ribose units in length) could now be purified to homogeneity in milligram quantities for  
236 downstream applications (Fig. 2d and e). The broad applicability our peptide poly-ADPr strategy  
237 was further validated with additional known PARP1:HPF1 target sequences (Bonfiglio et al., 2020)  
238 including TMA16 (amino acids 2-19, target residue S9), a fragment of the PARP1 automodification  
239 domain (amino acids 501-515, target residue S507), and a secondary histone H3 site (amino acids  
240 21-34; target residue S28). The mono-, di-, tri-, and tetra- ADP-ribosylated species were isolated  
241 for each of these peptides (Supplementary Fig. 2f and g). Thus, PARP1 can dependably elongate  
242 ADP-ribose chains from peptides that have been 'primed' with serine mono-ADP-ribose by  
243 PARP1:HPF1. We do note that overall poly-ADP-ribosylated product yields vary depending upon  
244 target peptide identity, but all reactions could be optimized to obtain milligram quantities of each  
245 unique product (see 'Methods' for details).

246

### 247 ***ADP-ribosylated H2B and H3 peptides engage the ALC1 macrodomain with equal affinity***

248 Extensive precedent exists demonstrating that chromatin remodeling enzymes are regulated by  
249 modifications on the nucleosome substrate (Clapier and Cairns, 2012; Hauk et al., 2010). The  
250 Ladurner lab recently reported that the ALC1 macrodomain exhibits high affinity ( $K_d \sim 10$  nM) for  
251 free tri-ADP-ribose with little to no binding detectable for free mono- and di-ADP-ribose  
252 molecules (Singh et al., 2017). We therefore chose to pursue ALC1 for our initial ADP-ribosylated  
253 histone peptide interaction studies. Nine fluorescently-labeled, ADP-ribosylated histone peptides  
254 (H2BS6ADPr<sub>1-4</sub> and H3S10ADPr<sub>1-5</sub>) were prepared for fluorescence polarization-based interaction  
255 assays (Supplementary Fig. 3). We note that the ADP-ribose polymerization reaction is more  
256 efficient with the H3 peptide and hence longer peptide-conjugated ADP-ribose chains could be  
257 isolated relative to H2B. Initial assay development was carried out by titrating a commercially

258 available pan-ADP-ribose detection reagent (an Af1521 macrodomain-Fc region fusion)(Gibson et  
259 al., 2017) into each peptide. This reagent exhibits ADPr-dependent binding for all H2B and H3  
260 peptides, with affinity decreasing precipitously for chains less than three ADP-ribose units in length  
261 (Fig. 3a, b, and Supplementary Table 1).

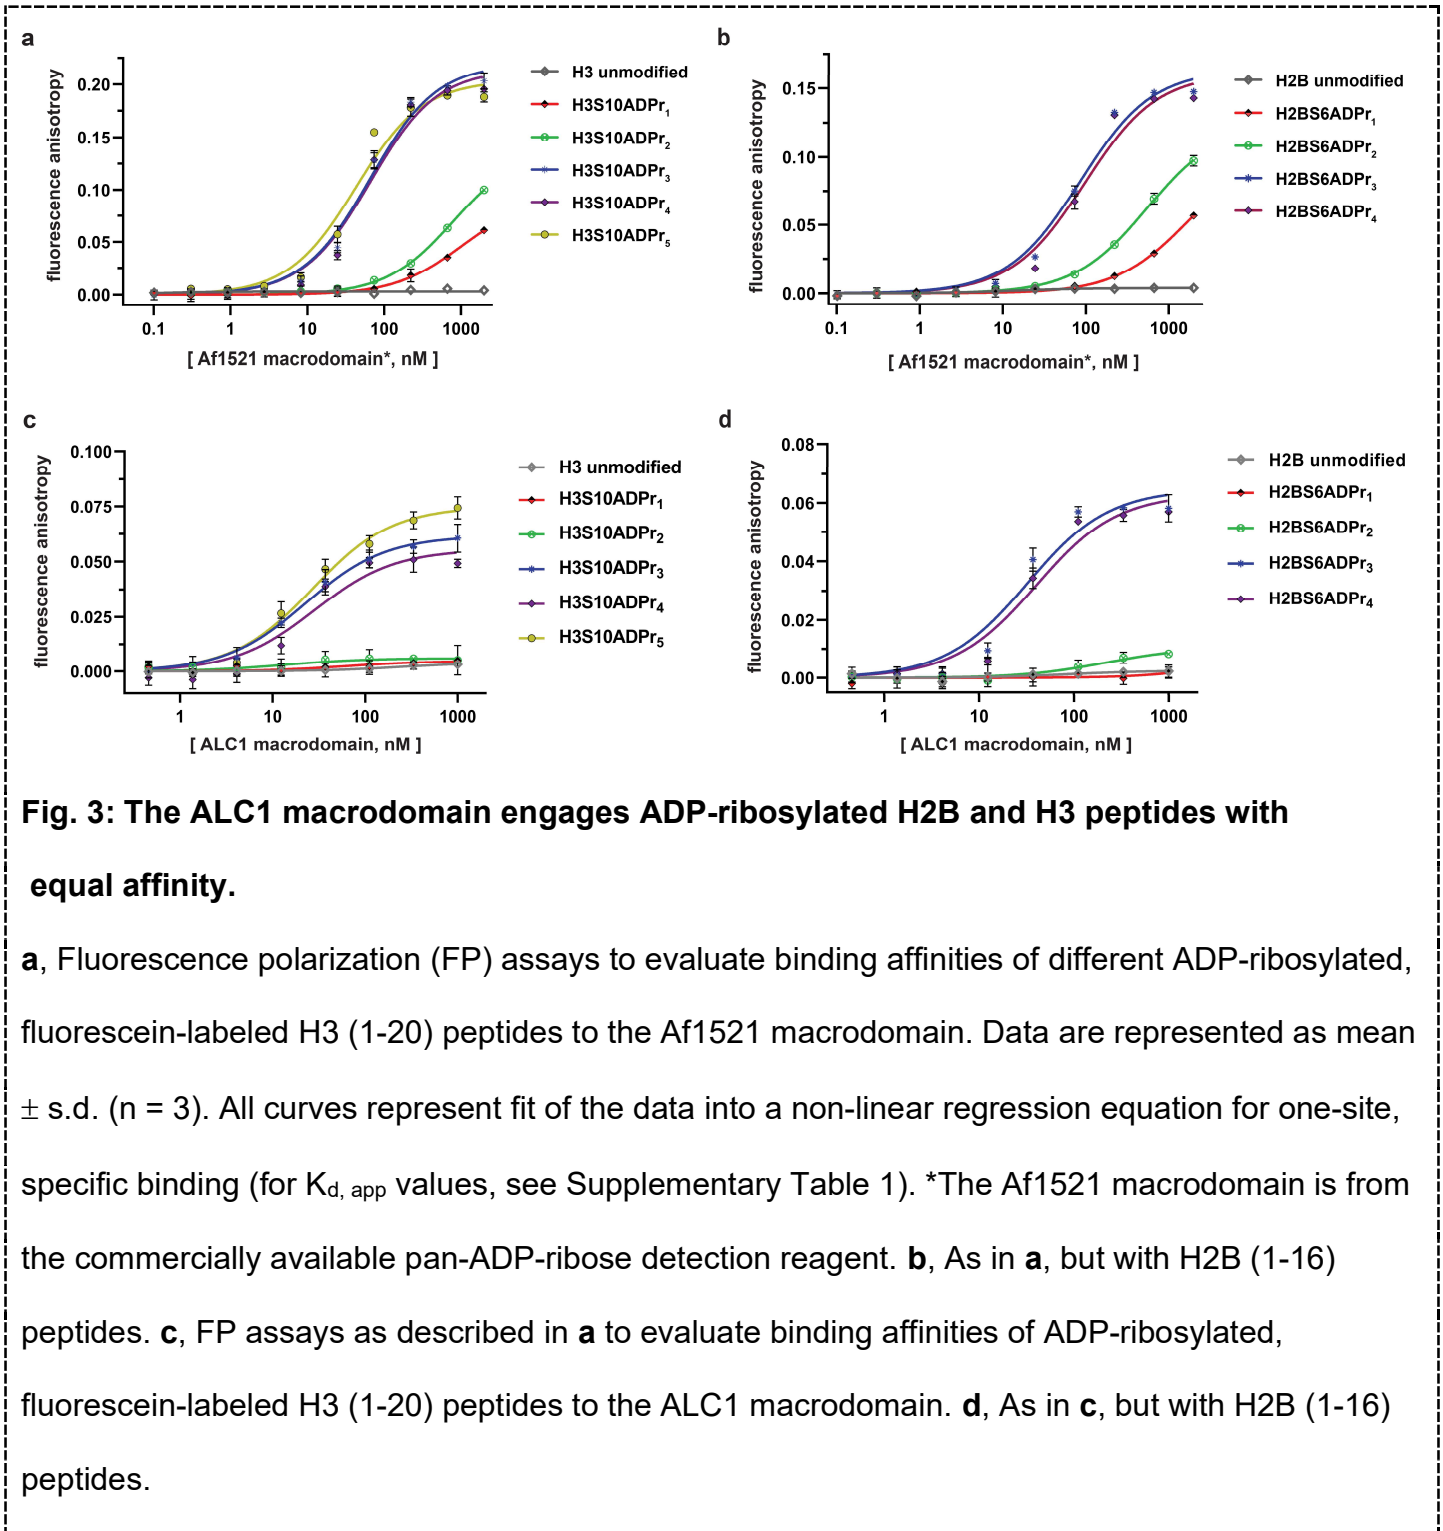

273 Similar experiments were performed by titrating the ALC1 macrodomain into each fluorescently-  
274 labeled histone peptide for apparent dissociation constant ( $K_{d, app}$ ) calculations. Consistent with  
275 free ADP-ribose binding preferences (Singh et al., 2017), the mono- and di-ADP-ribosylated H2B  
276 and H3 peptides failed to appreciably interact with the ALC1 macrodomain. Contrastingly, all tri-,  
277 tetra-, and penta-ADP-ribosylated peptides are high-affinity ligands with  $K_{d, app}$  ranging from ~21-37  
278 nM (Fig. 3c, d, and Supplementary Table 1). Considering the H2BS6ADPr<sub>3-4</sub> and H3S10ADPr<sub>3-5</sub>  
279 peptides exhibit similar affinities, we concluded that the tri-ADP-ribose modification is likely  
280 sufficient for optimal ALC1 macrodomain:peptide engagement. These data also indicate that while  
281 the ALC1 macrodomain engages the H2BS6 and H3S10-modified peptides, it does not exhibit  
282 sequence-based preference for either site.

283

### 284 ***Preparation of full-length, homogenously ADP-ribosylated histone proteins and assembly*** 285 ***into nucleosomes***

286 Chromatin remodelers comprise multiple domains that function synergistically to recognize  
287 nucleosome substrates and mobilize histone proteins (Bowman and Poirier, 2015). This  
288 phenomenon implies that macrodomain-ligand specificity may not represent the sole determinant  
289 of ALC1 substrate preference. To address this, we sought to analyze full-length ALC1 remodeling  
290 activity in the context of ADP-ribosylated nucleosome substrates. The first step towards  
291 reconstituting modified nucleosomes requires preparation of full-length, ADP-ribosylated histones.  
292 We generated a series of ADP-ribosylated H2B and H3 peptides with C-terminal thioesters to  
293 enable an eventual native chemical ligation reaction to the remainder of the corresponding histone  
294 fragment (Fig. 4a). The following six semi-synthetic, full-length histones were prepared:  
295 H2BS6ADPr<sub>1</sub>, H2BS6ADPr<sub>3</sub>, H2BS6ADPr<sub>4</sub>, H3S10ADPr<sub>1</sub>, H3S10ADPr<sub>3</sub>, and H3S10ADPr<sub>4</sub>  
296 (Supplementary Fig. 4). The tri- and tetra-ADP-ribosylated H2B and H3 proteins were essential to  
297 probe the effect of chain length and nucleosome modification site on ALC1 activation. Mono-ADP-

298 ribosylated histones were prepared to serve as negative controls and to further corroborate ALC1  
299 macrodomain interaction results. All final protein products were characterized via HPLC/MS  
300 analysis and determined to be >95% pure, hence validating our workflow to reconstitute  
301 homogenously ADP-ribosylated proteins (Fig. 4b and Supplementary Fig. 4).

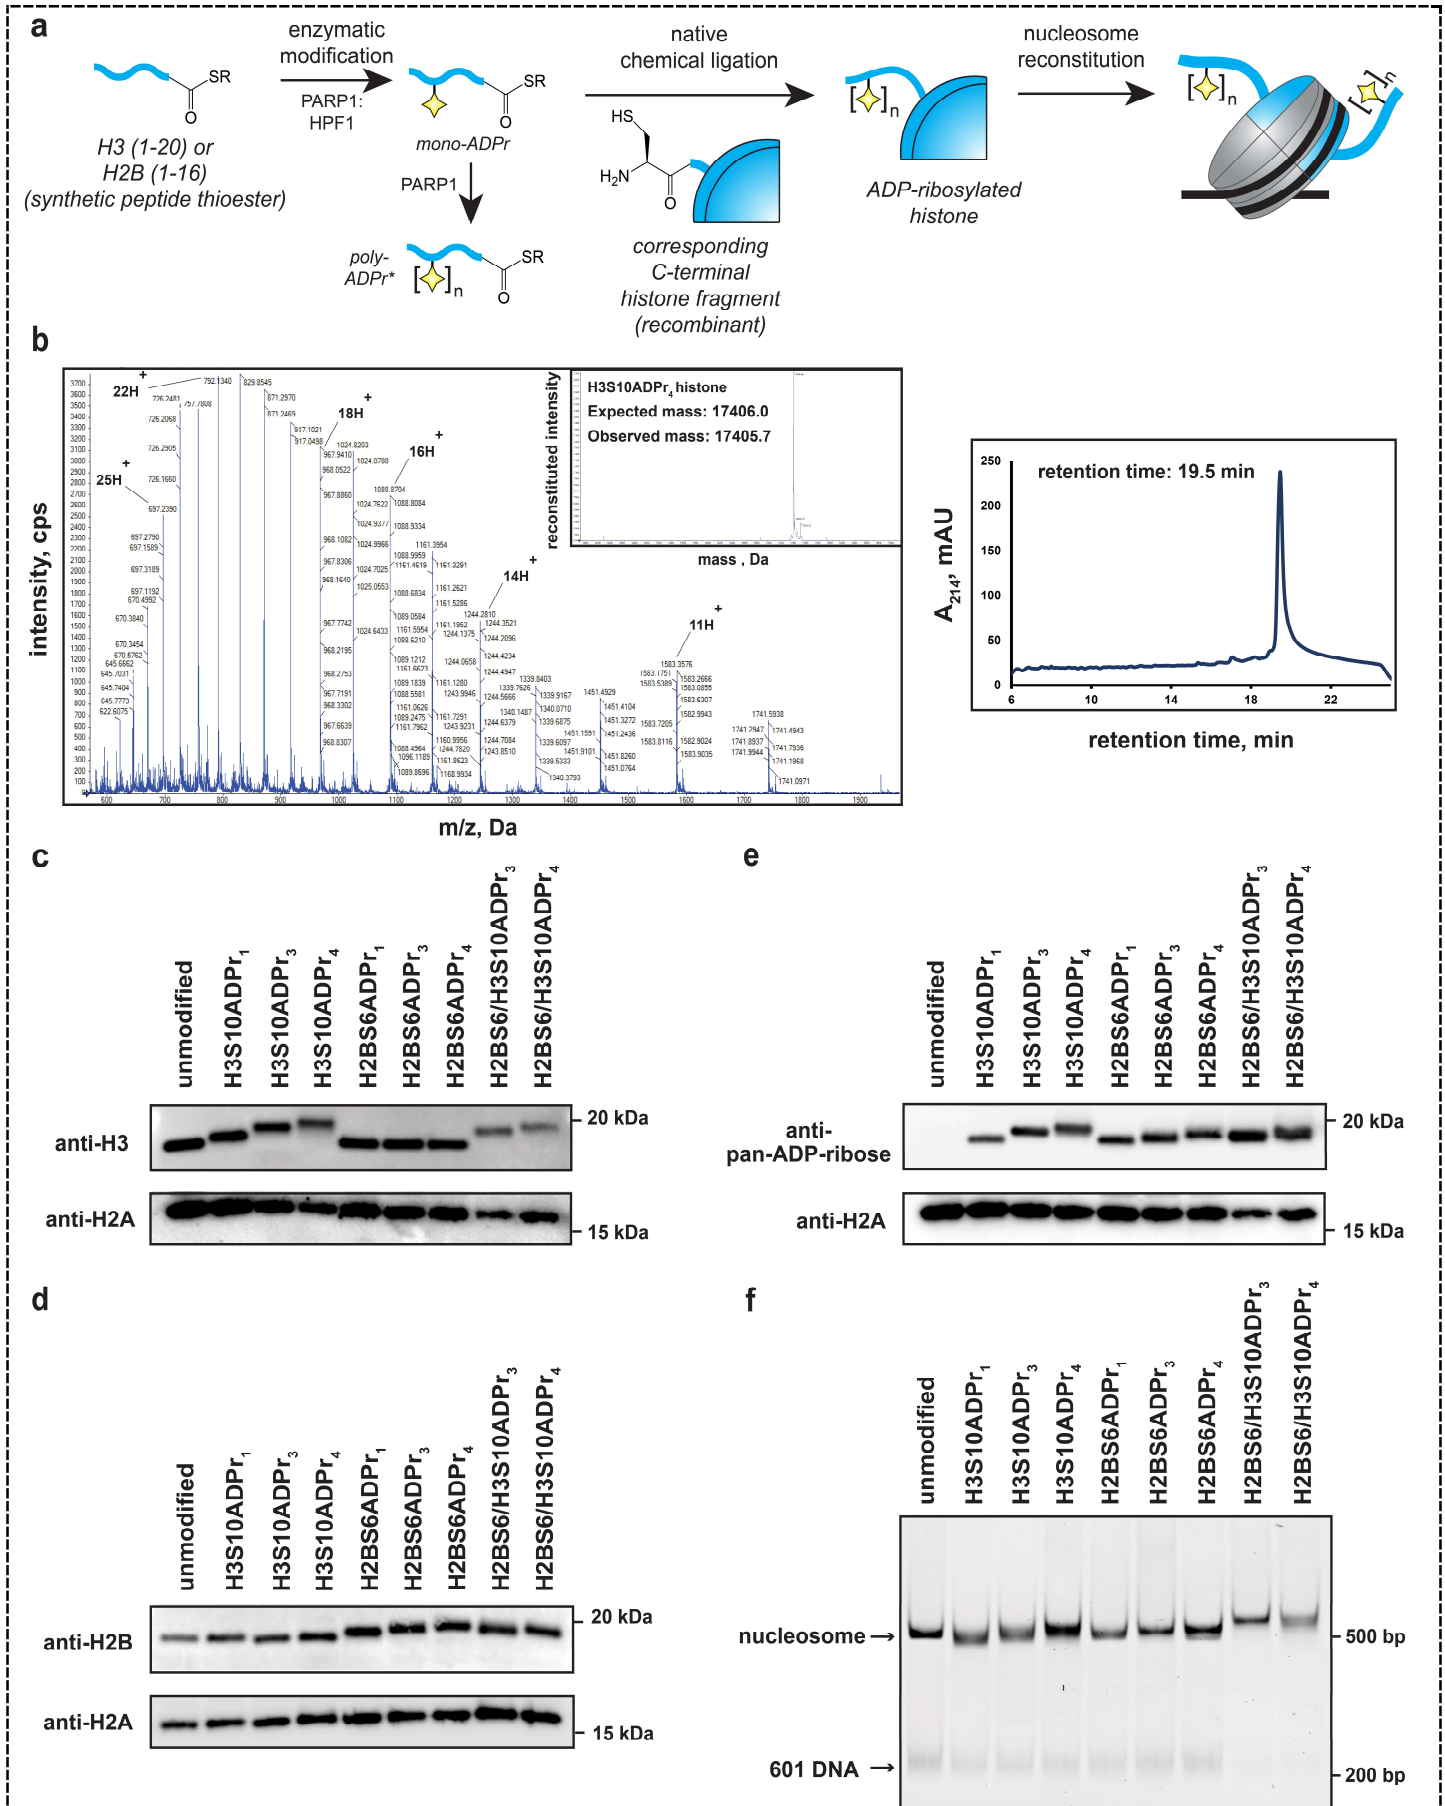



**Fig. 4: Installation of homogenous ADP-ribose polymers onto reconstituted nucleosomes via a chemoenzymatic strategy.**

**a**, A schematic depicting the protein semi-synthesis-based strategy to install homogenous ADP-ribose polymers at specific sites on histone proteins. The nucleosome cartoon includes DNA (black line), as well as the histone protein octamer core (grey = recombinant histones, blue = semi-synthetic histone). \*The poly-ADP-ribosylated peptides are separated via HPLC to yield homogenous species prior to the ligation reaction. **b**, Representative HPLC/MS characterization of the full-length H3S10ADP<sub>4</sub> protein. Raw ESI-MS spectra, MS deconvolution, and RP-HPLC chromatogram are shown. RP-HPLC gradients are from 0-80% Solvent B (2-22 min). For additional histone HPLC and MS characterizations, see Supplemental Fig. 4. **c**, Western blot analysis of histone H3 following nucleosome assembly. ADP-ribose-dependent gel migration shifts demonstrate sample homogeneity. **d**, Histone H2B analysis as described in panel **c**. **e**, Pan-ADP-ribose detection western blot analysis of all assembled nucleosomes. **f**, Native gel analysis of assembled nucleosomes. Single nucleosome bands and trace levels of free 601 DNA demonstrate sample homogeneity and assembly efficiency. EtBr = ethidium bromide stain.

Each of the six semi-synthetic ADP-ribosylated histones were combined with the necessary recombinant histones to form stable histone octamer complexes (henceforth labeled as H2BS6ADPr<sub>n</sub> or H3S10ADPr<sub>n</sub>, depending on the modified histone they possess) via established protocols (Luger et al., 1999). We also prepared an octamer that contains both H2BS6ADPr<sub>3</sub> and H3S10ADPr<sub>3</sub> (H2BS6/H3S10ADPr<sub>3</sub>), and another that contains both H2BS6ADPr<sub>4</sub> and H3S10ADPr<sub>4</sub> (H2BS6/H3S10ADPr<sub>4</sub>). Following purification via gel filtration chromatography, octamer quality and ADPr stability was determined via SDS-PAGE/western blot analysis. Histone detection via western blotting with H2B and H3 antibodies revealed single, distinct species for each

327 ADP-ribosylated H2B and H3 histone (Fig. 4c and d). We found that ADP-ribose chain length is  
328 inversely proportional to histone gel migration distance, suggesting that single migration bands for  
329 H2B and H3 are a reliable indicator of modification stability and sample homogeneity. Additionally,  
330 all gel species that correspond to ADP-ribosylated histones exhibited strong signal in a pan-ADP-  
331 ribose detection blot (Fig. 4e). Next, the eight ADP-ribosylated octamers were assembled into  
332 unique nucleosomes using a DNA template that contains the '601' nucleosome positioning  
333 sequence and is compatible with a previously reported restriction enzyme accessibility (REA)-  
334 based chromatin remodeling assay (see Methods for details)(He et al., 2006). Nucleosome quality  
335 was analyzed on a native polyacrylamide TBE gel, which shows a single, distinct nucleosome  
336 species for each assembly and only trace levels of free 601 DNA (Fig. 4f). Notably, ADP-ribose  
337 has a polymer length-dependent effect on nucleosome gel migration patterns, again indicating  
338 sample homogeneity and modification stability. We concluded that all of our site-specifically ADP-  
339 ribosylated histones could be efficiently incorporated into nucleosomes for downstream chromatin  
340 remodeling experiments.

341

### 342 ***Serine ADPr converts nucleosomes into robust ALC1 substrates***

343 Recombinant, full-length ALC1 was isolated to determine chromatin remodeling rate constants with  
344 each ADP-ribosylated nucleosome substrate. The DNA from each remodeling reaction was  
345 isolated at various time points and remodeling-dependent restriction enzyme cleavage was  
346 visualized on a polyacrylamide TBE gel and quantified via densitometry (Fig. 5a and  
347 Supplementary Fig. 5a). Consistent with the macrodomain interaction results, ALC1 exhibits  
348 relatively low remodeling rate constants ( $< 3 \times 10^{-4} \text{ min}^{-1}$ ) with unmodified and mono-ADP-  
349 ribosylated nucleosome substrates (Fig. 5b and Supplementary Table 2). Contrastingly, robust  
350 chromatin remodeling activity is observed with all nucleosomes that contain tri- or tetra-ADP-ribose  
351 at the H2B or H3 sites. The H2BS6/H3S10ADPr<sub>4</sub> nucleosome has the most striking effect on the

352 ALC1 remodeling rate constant, which increases ~370-fold relative to the unmodified nucleosome.  
353 Further rate constant analyses show that ALC1 exhibits modest preference for the H2BS6  
354 modification site and tetra-ADP-ribose polymers (Fig. 5b). Importantly, addition of H2BS6ADPr<sub>4</sub> or  
355 H3S10ADPr<sub>4</sub> peptide to a reaction containing ALC1 and unmodified nucleosome was unable to  
356 appreciably stimulate remodeling activity regardless of peptide concentration (Fig. 5c and  
357 Supplementary Fig. 5b and c). Therefore, in addition to disrupting an autoinhibited conformation,  
358 the modified histone tail:macrodomain interaction is crucial for presenting the ATPase domain to  
359 the nucleosome.

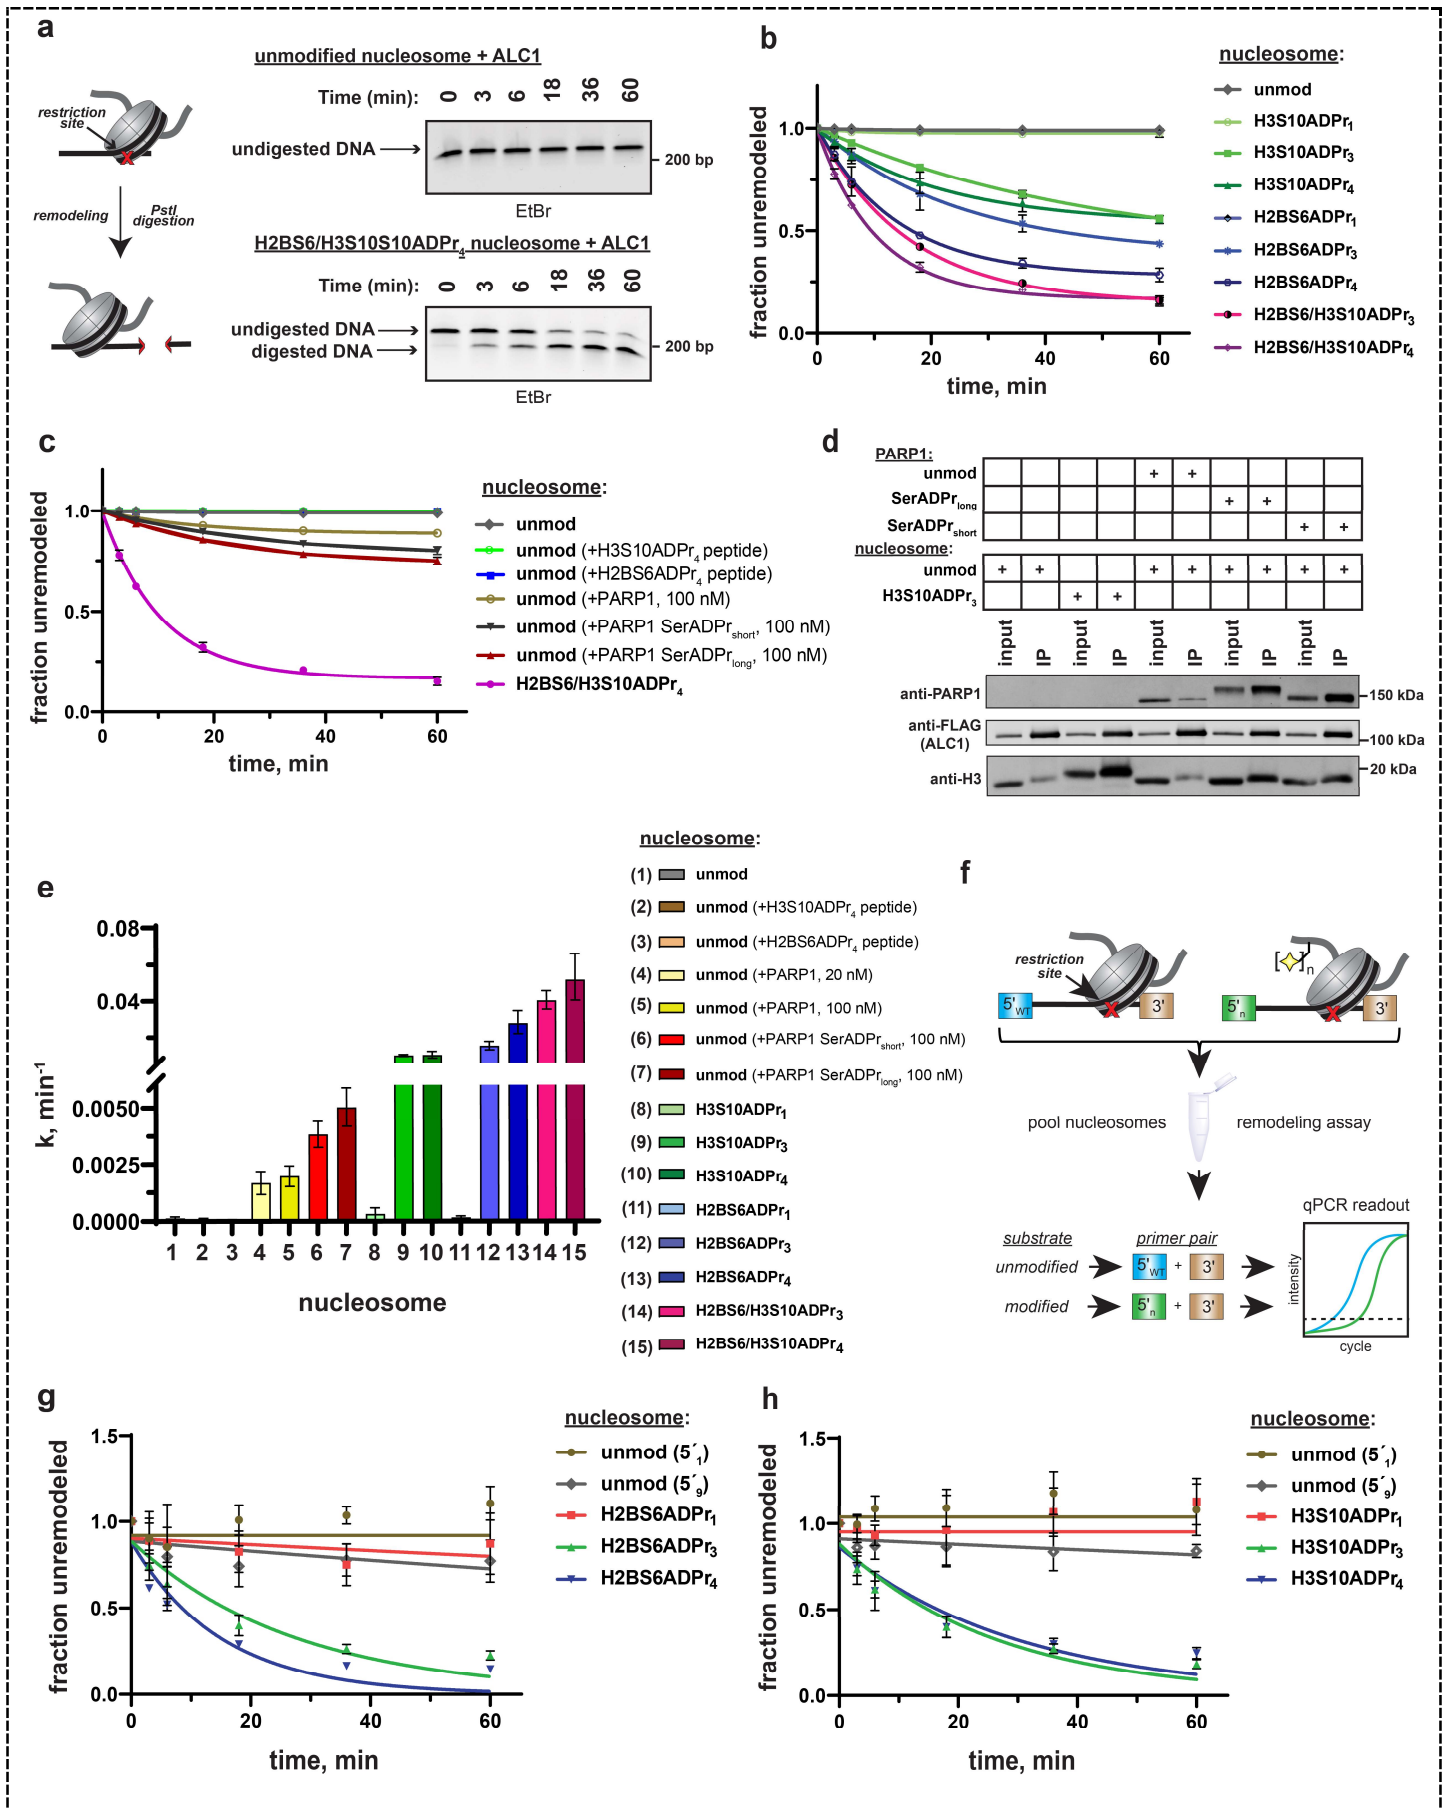

**Fig. 5: ADPr at H2BS6 and H3S10 convert nucleosomes into robust ALC1 substrates.**

**a**, Schematic depicting the REA assay for chromatin remodeling and representative TBE gel analyses of recombinant ALC1 activity on unmodified or H2BS6/H3S10ADPr<sub>4</sub> nucleosomes. **b**, ALC1 nucleosome remodeling assay time-course wherein each reaction comprises ALC1 and the indicated nucleosome ('unmod'= unmodified). **c**, As in **b**, but each reaction comprises ALC1, unmodified nucleosome (20 nM), and the indicated modified histone peptide or PARP1. Modified histone peptide concentration is equal to the corresponding full-length histone concentration (40 nM). The H2BS6/H3S10ADPr<sub>4</sub> nucleosome remodeling data is included for direct comparison. **d**, Western blot analysis of a FLAG immunoprecipitation (IP) wherein ALC1 is FLAG-tagged and its association with nucleosomes is analyzed in the presence and absence of unmodified or automodified PARP1. The corresponding input (5%) was loaded alongside the IP (elution) lanes for comparison. **e**, ALC1 remodeling rate constants calculated from data in **b**, **c** and Supplementary Fig. 5b. Rate constants were determined by fitting data to a non-linear regression model for one phase exponential decay. **f**, Schematic depicting the strategy to prepare heterogenous nucleosome substrate pools and determine ALC1 remodeling activity on specific nucleosomes. **g**, ALC1 nucleosome remodeling assay time-course for each nucleosome in the histone H2B mixed substrate pool. Two unmodified nucleosomes with different 5' primer sequences (5'<sub>1</sub> and 5'<sub>9</sub>) were included as internal controls. **h**, As in **g**, but with the histone H3 substrate pool. Data in **b**, **c**, **e**, **g**, and **h** are represented as mean  $\pm$  s.d. (n=3). Curves in **b**, **c**, **g** and **h** represent data fitting to a linear-regression model for one-phase exponential decay.

We next asked how ALC1 activation by nucleosome serine ADPr compares to activation by auto-ADP-ribosylated PARP1(Gottschalk et al., 2009; Gottschalk et al., 2012; Lehmann et al., 2017; Singh et al., 2017). As previously described, chromatin remodeling reactions were performed on unmodified nucleosome substrates in the presence of NAD<sup>+</sup> and PARP1(Gottschalk et al., 2009;

386 Gottschalk et al., 2012). In this experimental setup, PARP1 maintains auto-ADPr activity but is  
387 unable to modify histones due to absence of HPF1. Quantitative PARP1 auto-ADPr was observed  
388 within 5 min of initiating the reaction as judged by altered PARP1 gel migration in SDS-  
389 PAGE/western blot analyses (Supplementary Fig. 5d). PARP1 was added to the reaction at  
390 equimolar concentrations relative to nucleosome substrates 20 nM to closely mimic ADP-ribose  
391 concentrations in our modified nucleosome experiments or 100 nM to ensure optimal ALC1  
392 activation. We found that auto-ADP-ribosylated PARP1 leads to an ~12-fold increase in ALC1  
393 remodeling rate constant on unmodified nucleosomes (Fig. 5c and Supplementary Table 2).  
394 Notably, higher PARP1 concentrations were unable to further stimulate ALC1 remodeling activity  
395 (Supplementary Fig. 5e).

396

397 In the PARP1 automodification reaction described above, aspartate and glutamate side chains are  
398 the primary targets for ADPr as no HPF1 is present. However, in the cellular DNA damage  
399 response, it is now well-established that auto-modification occurs primarily on serine  
400 residues (Bonfiglio et al., 2017; Palazzo et al., 2018). We therefore performed a PARP1  
401 automodification reaction in the presence of low (5  $\mu$ M) and high (25  $\mu$ M) amounts of HPF1. By  
402 employing different HPF1 concentrations, a full-length PARP1 construct with relatively short  
403 (PARP1-SerADPr<sub>short</sub>) and long (PARP1-SerADPr<sub>long</sub>) serine-linked ADP-ribose chains could be  
404 generated. These constructs were purified over a heparin column to remove activating DNA and  
405 HPF1, which would otherwise abrogate the nucleosome interaction or induce histone ADPr,  
406 respectively. The auto-ADPr linkage identity was then validated via hydroxylamine treatment,  
407 which specifically cleaves ADPr from aspartate and glutamate side chains. As expected, the ADP-  
408 ribose chains conjugated to PARP1-SerADPr<sub>short</sub> and PARP1-SerADPr<sub>long</sub> are resistant to  
409 hydroxylamine cleavage (Supplementary Fig. 5f). Immunoprecipitations with Flag-tagged ALC1  
410 revealed that PARP1-SerADPr<sub>short</sub> and PARP1-SerADPr<sub>long</sub> are able to induce formation of an

411 ALC1:nucleosome:PARP1 complex (Fig. 5d). We then titrated each construct into an ALC1  
412 remodeling reaction with unmodified nucleosomes and observed optimal remodeling stimulation at  
413 100 nM of automodified PARP1 (Supplementary Fig. 5g). Remodeling rate constant calculations  
414 show that PARP1-SerADPr<sub>short</sub> and PARP1-SerADPr<sub>long</sub> stimulate ALC1 activity ~28-fold and ~36-  
415 fold, respectively, when compared to activity in the absence of automodified PARP1 (Fig. 5c and  
416 Supplementary Table 2). We stress that while nucleosome serine ADPr is superior to PARP1 auto-  
417 ADPr for ALC1 activation in biochemical assays (Fig. 5e), these data do not allow us to conclude  
418 that this is the case in the cellular DNA damage response. However, our work does raise  
419 interesting new questions about regulatory mechanisms underlying ALC1 activity (see Discussion).

420

### 421 ***ALC1 specificity persists within mixed nucleosome pools***

422 To further probe ALC1 nucleosome substrate selectivity, we designed a method to pool  
423 unmodified, mono, tri-, and tetra-ADP-ribosylated nucleosomes into a single reaction and analyze  
424 nucleosome remodeling activity for each unique substrate simultaneously (Fig. 5f). Similar next-  
425 generation sequencing-based approaches have been implemented for rate constant analysis of  
426 the ISWI chromatin remodeler family (Dann et al., 2017). If ALC1 activity is dependent upon the  
427 ADPr status of target nucleosomes, only the tri- and tetra-ADP-ribosylated species should be  
428 efficiently remodeled in this substrate competition-based platform. We again turned to the REA  
429 assay but appended a unique 5' 15-base pair primer binding site to each 601 DNA template  
430 (Supplementary Table 3). Importantly, we designed priming sequences with similar primer binding  
431 efficiencies and found that DNA sequence alterations in this region of the template do not affect  
432 remodeling rates (Supplementary Fig. 5h). In this assay, restriction enzyme-dependent destruction  
433 of a given 601 template amplicon is quantified by qPCR to monitor remodeling activity. Thus,  
434 unique primer pairs corresponding to each nucleosome can be employed to determine substrate-  
435 specific chromatin remodeling rate constants in heterogenous substrate reactions.

436

437 We assembled a nucleosome pool comprising equimolar concentrations of H2BS6ADPr<sub>1</sub>,  
438 H2BS6ADPr<sub>3</sub>, H2BS6ADPr<sub>4</sub>, and two unmodified nucleosome controls. An additional unmodified  
439 nucleosome without the PstI restriction site and a free DNA template with the PstI site were also  
440 included as negative and positive digestion controls, respectively. The heterogeneous nucleosome  
441 substrate pool was employed in ALC1 remodeling reactions as described above, and DNA from  
442 various time points was isolated and analyzed via qPCR. We found that relative remodeling rate  
443 constants were consistent with those observed in our single substrate, densitometry-based assays  
444 (Fig. 5g and Supplementary Table 3). ALC1 again exhibits modest preference for the H2BS6ADPr<sub>4</sub>  
445 nucleosome relative to the H2BS6ADPr<sub>3</sub> nucleosome. Remodeling was very slow for the  
446 unmodified and H2BS6ADPr<sub>1</sub> nucleosomes and corresponding rate constants could not be  
447 determined in this assay platform. Substrate preferences were also maintained within a similar  
448 H3S10-modified substrate pool (Fig. 5h and Supplementary Table 3). Notably, H3 nucleosomes  
449 were analyzed as a separate population because they require a higher ALC1 concentration to  
450 achieve optimal dynamic range in the qPCR-based assay. The pooled substrate approach  
451 demonstrates that ALC1 activity is highly specific for binding-competent nucleosome substrates  
452 and target disengagement triggers rapid transition back to an inactive conformation. This  
453 mechanism likely minimizes that likelihood that freely diffusing, activated ALC1 is present in the  
454 nuclear milieu.

455

### 456 ***Nucleosome serine ADPr triggers ALC1-dependent chromatin remodeling in nuclear lysates***

457 It is possible that a poly-anionic chain fused to H2BS6 or H3S10 destabilizes the histone  
458 octamer:DNA complex and thereby non-specifically sensitizes nucleosomes to ATP-dependent  
459 chromatin remodelers. To examine this concept, we isolated the ATP-dependent chromatin  
460 remodeler CHD4 for activity analysis. CHD4 lacks a macrodomain while its ATPase domain shares



a high degree of sequence similarity (63%) with ALC1 (Supplementary Fig. 6a), suggesting that the two enzymes may catalyze DNA translocation through similar mechanistic principles. The REA assay revealed that CHD4 remodels unmodified nucleosomes with a rate constant of  $\sim 0.01 \text{ min}^{-1}$  and this activity is not appreciably affected by the nucleosome ADPr status (Fig. 6a, b, Supplementary Fig. 6b, and Supplementary Table 2). These data suggest that nucleosome serine ADPr does not simply decrease the energy barrier to DNA translocation but rather serves to specifically stimulate ALC1-dependent chromatin remodeling.

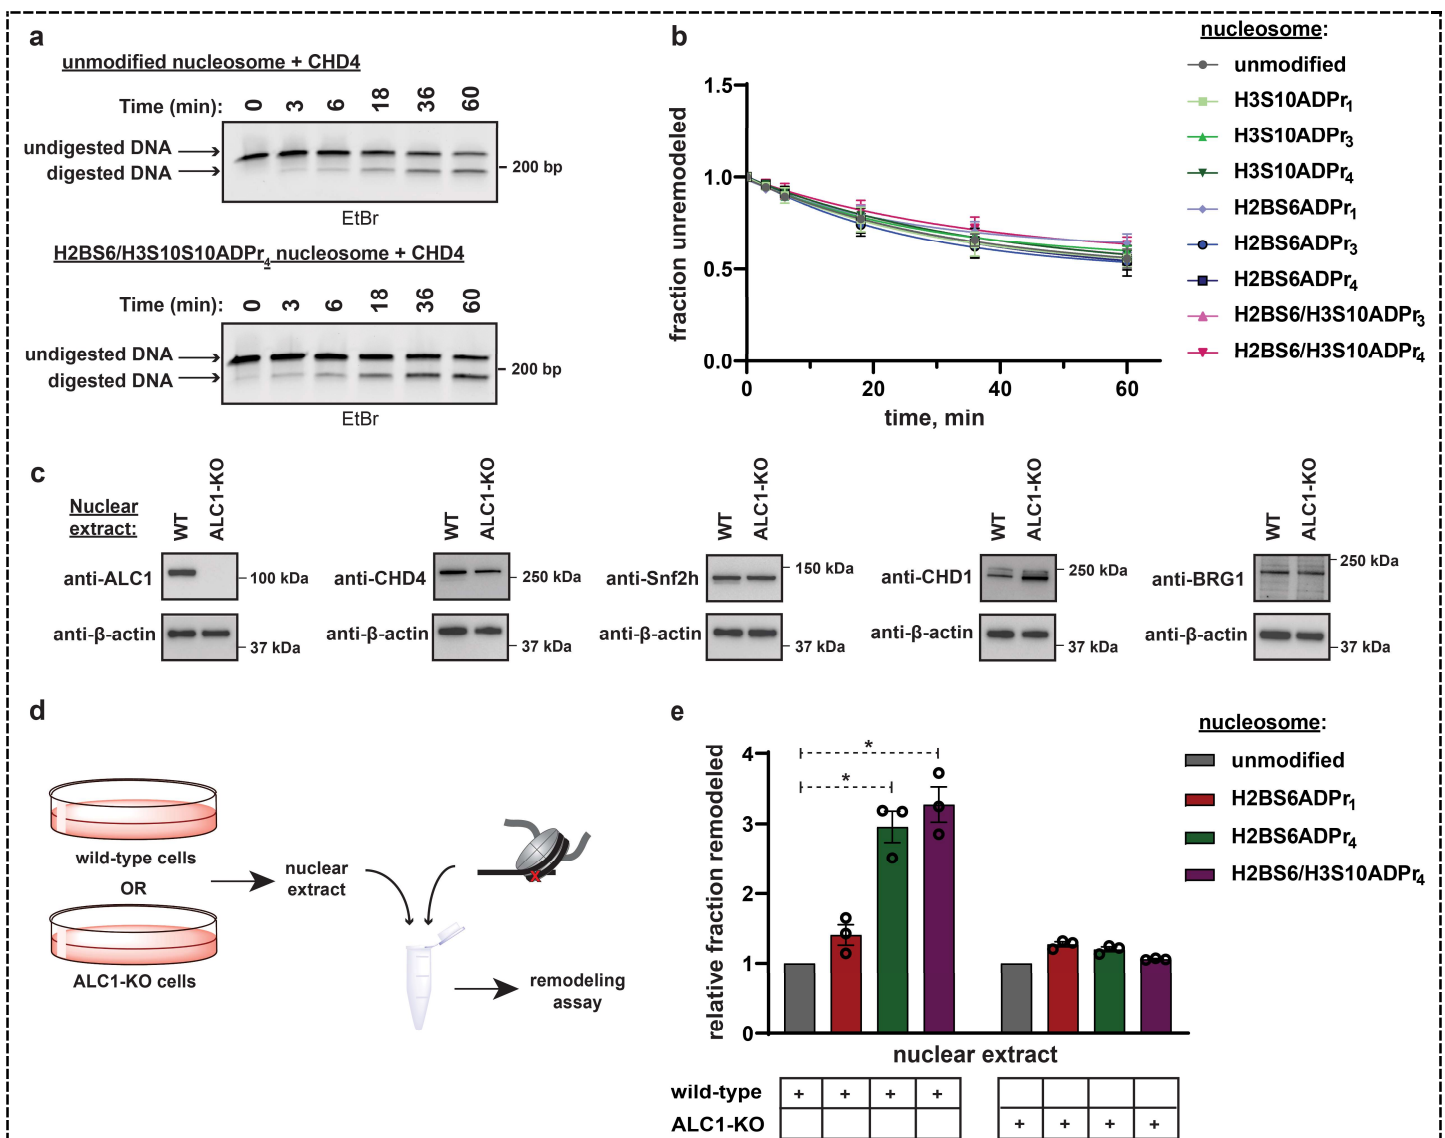

**Fig. 6: Nucleosome serine ADPr stimulates ALC1-dependent chromatin remodeling activity in nuclear lysates.**

471 **a**, Representative TBE gel analysis from a REA assay corresponding to recombinant CHD4  
472 chromatin remodeling activity on unmodified or H2BS6/H3S10ADPr<sub>4</sub> nucleosomes. **b**, CHD4  
473 nucleosome remodeling assay time-course wherein each reaction comprises CHD4 and the  
474 indicated nucleosome substrate. Data are represented as mean  $\pm$  s.d. (n = 3). Curves represent fit  
475 of data into a non-linear regression model for one-phase exponential decay. **c**, Western blot  
476 analysis demonstrating the presence of various chromatin remodelers in the wild-type or ALC1  
477 knock-out (KO) HEK293T nuclear extracts. **d**, Schematic depicting the strategy to analyze  
478 chromatin remodeling activity in wild-type or ALC1-KO HEK293T nuclear extracts. **e**, Nuclear  
479 extract nucleosome remodeling activity assay wherein each reaction comprises the indicated  
480 nucleosome substrate and wild-type or ALC1-KO HEK293T cell nuclear extracts. Total remodeling  
481 for each ADP-ribosylated nucleosome substrate relative to the unmodified nucleosome substrate in  
482 the respective nuclear extract is shown. Data are represented as mean  $\pm$  s.e.m. (n = 3). \* indicates  
483 p-value < 0.02, obtained using an unpaired Student's t-test with Welch's correction.

484  
485 To investigate the ability of nucleosome serine ADPr to stimulate ALC1 activity in a more  
486 physiological context, mammalian cell nuclear extracts were employed as a source of remodeling  
487 activity with the ADP-ribosylated nucleosome substrates. Nuclear extracts were prepared from  
488 wild-type or ALC1 knock-out (KO) HEK293T cells and the presence of various endogenous  
489 chromatin remodelers was confirmed (Fig. 6c and d). Each extract was then incubated with  
490 unmodified, H2BS6ADPr<sub>1</sub>, H2BS6ADPr<sub>4</sub>, or H2BS6/H3S10ADPr<sub>4</sub> nucleosomes and remodeling  
491 activity was determined via the REA assay. The wild-type extract exhibited a ~3-fold increase in  
492 remodeling activity towards the H2BS6ADPr<sub>4</sub> and H2BS6/H3S10ADPr<sub>4</sub> nucleosomes when  
493 compared to their unmodified counterpart (Fig. 6e). Contrastingly, there was no appreciable  
494 increase in activity towards the H2BS6ADPr<sub>1</sub> nucleosome. Strikingly, the ALC1-KO nuclear extract  
495 exhibited similar remodeling activity towards all nucleosomes regardless of their ADPr status (Fig.

6e, and Supplementary Fig. 6c). We also note that no accumulation of additional ADPr events was detected in these lysates throughout the duration of the assay and only minor ADPr hydrolysis from the H2BS6/H3S10ADPr<sub>4</sub> nucleosome was detected while other modified nucleosome substrates were unaffected (Supplementary Fig. 6d). These results suggest that nucleosome serine ADPr is sufficient to activate ALC1 in the nuclear milieu and that ALC1 is the primary chromatin remodeler responsible for directly manipulating the ADP-ribosylated nucleosomes described here.

## Discussion

Chemical and topological complexities have stymied previous efforts to synthesize poly-ADP-ribosylated proteins. Our investigation of HPF1-dependent and -independent PARP1 activities in peptide serine ADPr reactions guided the development of a multistep chemoenzymatic approach that is broadly applicable for the preparation of poly-ADP-ribosylated peptides and proteins. Through the use of chemically homogenous, ADP-ribosylated histones we were able to define a biochemical role for nucleosome serine ADPr and explore long-standing questions related to DNA damage-induced chromatin remodeling.

Multiple recent reports show that the PARP1/2:HPF1 complex catalyzes the formation of relatively short poly-ADP-ribose chains (Bilokapic et al., 2020; Bonfiglio et al., 2020; Gibbs-Seymour et al., 2016). Our study is unique in that we prepare unmodified and mono-ADP-ribosylated peptide substrates and use HPLC-MS to analyze PARP1 reaction products in the absence and presence of HPF1. This approach demonstrated that HPF1 simultaneously stimulates mono-ADPr activity and blocks ADP-ribose chain elongation on *trans*-peptide substrates. Our data support PARP2:HPF1 structural implications that mono- and poly-ADPr are mutually exclusive activities (Suskiewicz et al., 2020) and demonstrate that structural dynamics are insufficient to

521 accommodate both catalytic mechanisms. Notably, HPF1 and PARP1/2 undergo DNA damage-  
522 induced ADPr, which may serve to disrupt the complex and initiate chain elongation from mono-  
523 ADP-ribosylated proteins. This would explain why we and others observe elongation activity in  
524 recombinant assays that include relatively high molar ratios of HPF1 to PARP1; ADPr on one or  
525 both complex components decreases the effective PARP1:HPF1 concentration as the reaction  
526 progresses. It is also likely that high HPF1 concentration is necessary to ensure rapid binding to  
527 the pre-formed PARP1:DNA complex(Suskiewicz et al., 2020) for immediate inhibition of  
528 elongation activity. Alternatively, we note that the cellular molar ratio of PARP1 to HPF1  
529 (20:1)(Hein et al., 2015) is favorable for a mechanism wherein free PARP1 displaces the  
530 PARP1/2:HPF1 complex once mono-ADP-ribose seeding has occurred.

531  
532 In chromatin remodeling experiments, ALC1 exhibits modest preference for the H2BS6 site and  
533 tetra-ADPr despite the observation that all H2BS6ADPr<sub>3,4</sub> and H3S10ADPr<sub>3,4</sub> peptides engage the  
534 ALC1 macrodomain with equal affinity. It is therefore likely that each histone modification site  
535 requires an ideal ADP-ribose chain length that allows the ATPase domain to progress through the  
536 DNA translocation cycle while the macrodomain:histone tail interaction is maintained. There are  
537 several factors that may explain why nucleosome serine ADPr more efficient than auto-ADP-  
538 ribosylated PARP1 for ALC1 activation in our assays: (i) robust ALC1 activation by auto-ADP-  
539 ribosylated PARP1 may require a specific modification site and ADP-ribose chain length that is  
540 only partially represented on our automodified PARP1 constructs, (ii) the PARP1:nucleosome  
541 interaction, while necessary for ALC1 recruitment and activation, may also sterically abrogate DNA  
542 translocation activity, and (iii) a direct interaction between ALC1 and ADP-ribosylated nucleosomes  
543 may be stronger than the ternary complex that is mediated by automodified PARP1, as evidenced  
544 from nucleosome pull-down efficiency in Fig. 5d.

546 Critical distinctions unique to nucleosome ADPr over other ADP-ribosylated proteins are: (i) the  
547 nucleosome-incorporated histones cannot diffuse away from the DNA damage site, and (ii) the  
548 stimulatory ADP-ribose chain is not tethered to a DNA-bound protein that may sterically hinder  
549 remodeling by ALC1. Therefore, nucleosome ADPr offers a fail-safe mechanism to ensure that  
550 robust ALC1-dependent remodeling can persist in the event that automodified PARP1 dissociates  
551 from the damage site prior to ALC1 activation. It is also interesting that ALC1 exhibits prolonged  
552 retention at DNA damage sites in HPF1-null cells where serine ADPr does not occur (Gibbs-  
553 Seymour et al., 2016). This is consistent with our observation that aspartate/glutamate-  
554 automodified PARP1 is the least potent activator in biochemical assays. It is plausible that serine  
555 ADPr, be it tethered to the nucleosome or PARP1, is critical for ALC1 remodeling activity at DNA  
556 damage sites in cells. While our technology has allowed us to separate and characterize ALC1  
557 activation by ADPr on nucleosomes or PARP1 in a reconstituted environment, new approaches will  
558 be required to specifically control these parameters and analyze their contributions to ALC1-  
559 dependent remodeling at damage sites in cells.

560  
561 Analyses of remodeling activity in biochemical assays and mammalian cell nuclear extracts show  
562 that nucleosome serine ADPr is sufficient to specifically activate ALC1 in the absence of auto-ADP-  
563 ribosylated PARP1. We surmise that other PARP1/2-dependent chromatin remodelers are  
564 recruited to damage sites via alternative ADPr modification sites or chain lengths, as has been  
565 reported for SMARCA5 (Smeenk et al., 2013). Additionally, these remodelers may not directly  
566 interact with ADP-ribose but are rather recruited by alternative PARP1/2-dependent activities, a  
567 phenomenon that has been demonstrated for CHD4 (Smith et al., 2018). Thus, our study supports  
568 the 'PAR code' hypothesis (Aberle et al., 2020) as it pertains to chromatin structure at DNA lesions  
569 wherein different ADPr sites and chain lengths may orchestrate spatiotemporal control over  
570 unique remodeler activities. Notably, dozens of proteins reportedly exhibit PARP1/2-dependent

571 recruitment to DNA damage sites and have been annotated as ADP-ribose 'readers'(Ray  
572 Chaudhuri and Nussenzweig, 2017; Teloni and Altmeyer, 2016). With full-length ADP-ribosylated  
573 proteins, ADPr-mediated activities can now be reconstituted for rigorous biochemical, biophysical,  
574 and structural analysis.

575

576 Beyond protein recruitment, it will now be possible to explore the direct biophysical effects that  
577 H2B and H3 ADPr have on poly-nucleosome array structure and compaction. Our modular  
578 chemoenzymatic approach can also be expanded to other PARP1/2:HPF1 substrate proteins,  
579 wherein one would expect to find ADPr exerts its effects via unique regulatory mechanisms that  
580 are tailored to the target protein. As demonstrated here, critical aspects of PARP biological  
581 function can be unveiled by reconstituting ADP-ribosylated proteins and related signaling pathway  
582 components. A greater understanding of PARP-regulated biological processes, including ALC1  
583 activation, may lead to identification of new biomarkers and therapeutic strategies for PARP  
584 inhibitor-sensitive diseases.

585

### 586 ***Technological limitations***

587 The method described here is currently limited to installation of ADP-ribose units ~4-5 linear units  
588 in length. Exceedingly large-scale reactions would be required to prepare peptides modified with  
589 longer ADP-ribose chains. Therefore, this method is ideal to study signal transduction events that  
590 are mediated by relatively short ADP-ribose chains. Our strategy also requires that a peptide of  
591 interest be a substrate for the PARP1:HPF1 complex. Alternative ADP-ribosyltransferases will be  
592 required to install ADPr on proteins that are not endogenous targets of this complex using the  
593 chemoenzymatic approach presented here. Regarding accessibility of modification sites that are  
594 not proximal to the protein amino-terminus: as proof of feasibility, the H3S28 peptide construct  
595 (amino acids 21-34) was prepared with an N-terminal thiazolidine and a C-terminal bis(2-

596 sulfanylethyl)amido (SEA) group. This peptide can be easily activated for N-terminal (via SEA to  
597 thioester conversion) or C-terminal ligations (via thiazolidine to N-terminal cysteine conversion) and  
598 such a synthetic strategy will enable sequential protein ligations in the future. Lastly, our method is  
599 still susceptible to restraints that exist throughout the field of protein chemistry. This means that  
600 alternative protein ligation technologies will be required to install modification onto full-length  
601 proteins that are not amenable to protein folding.

602

### 603 **Acknowledgements**

604 We thank Dr. W. Lee Kraus, Dr. Deepak Nijhawan, Dr. Steven McKnight, Dr. Benjamin Tu and  
605 members of the Liszczak laboratory for insightful discussions. We thank Dr. Andrew Lemoff and  
606 the UT Southwestern Proteomics Core for technical assistance. We also thank members of the  
607 laboratories of Dr. Ping Mu and Dr. Michael Roth for help with reagents. This work was supported  
608 by grants from the Welch Foundation (I-2039 to G.L.), the Cancer Prevention Research Institute of  
609 Texas (RR180051 to G.L.), and the American Cancer Society (UTSW-IRG-17-174-13). G.L. is the  
610 Virginia Murchison Linthicum Scholar in Medical Research.

611

### 612 **Author contributions**

613 G.L., R.B., J.M., and K.T., conceived the study and designed experiments. G.L., R.B., J.M., J.S.,  
614 and K.T. carried out molecular cloning, protein purification and characterization, peptide synthesis  
615 and protein ligation chemistries. G.L., J.M., R.B. and K.T. performed peptide interaction and ADPr  
616 assays. N.S.W., J.K. and J.M. performed LC-MS/MS analysis. J.M. and G.L. performed all  
617 chromatin remodeling and cellular experiments. All authors analyzed data. G.L. and J.M. wrote the  
618 manuscript and prepared figures with input from all authors.

619

### 620 **Declaration of interests**

621 The authors declare no competing interests.

622

### 623 **Quantification and statistical analysis**

624 Details related to replicates, error, and curve fitting are described in respective figure legends. In

625 Fig. 6e, the difference of means of two samples was statistically significant with p-value < 0.02,

626 obtained using an unpaired Student's t-test with Welch's correction.

627

### 628 **Contact for reagent and resource sharing**

629 Further information and requests for reagents may be directed to and will be fulfilled by the Lead

630 Contact, Dr. Glen Liszczak ([glen.liszczak@utsouthwestern.edu](mailto:glen.liszczak@utsouthwestern.edu)).

631

### 632 **Data availability**

633 Representative HPLC chromatograms, LC-MS characterizations and gel images are included in

634 Supplementary Information. Complete raw data (in triplicate) for all quantitative experiments are

635 included in the excel spreadsheets of Supplementary Dataset. Additional data will be provided

636 upon request.



637 **METHODS**

638

639 **Molecular cloning, protein expression, and protein purification**

640 *General protocols*

641 All PCR amplification steps described here were performed using the Phusion High-Fidelity DNA  
642 Polymerase (NEB) according to the manufacturer's protocols. All DNA oligonucleotides were  
643 synthesized by Sigma-Aldrich (Milwaukee, WI) or Integrated DNA Technologies (Coralville, IA). All  
644 plasmids used in this study were sequence verified by GENEWIZ (South Plainfield, NJ) or  
645 EurofinsGenomics (Louisville, KY). All cloning was carried out using Mach1 *E. coli* cells  
646 (ThermoFisher) and protein expression in *E. coli* was carried out in Rosetta2 cells (Sigma-Aldrich).

647

648 *PARP1/PARP2 Expression and Purification*

649 The full-length PARP1 gene was purchased from GE Healthcare and subcloned into a pACEBac1  
650 plasmid bearing an N-terminal 6xHis-tag via a Gibson Assembly (NEB). The PARP2 expression  
651 plasmid (C-terminal FLAG-6xHis-tag) is available on Addgene (plasmid #: 111574). PARP1 and  
652 PARP2 proteins were produced in Sf9 cells (ThermoFisher) using a baculovirus expression  
653 system. Corresponding plasmids were transformed into DH10Bac cells (ThermoFisher) and  
654 bacmids were isolated via manufacturer's protocols (ThermoFisher). All subsequent Sf9 cell and  
655 baculovirus manipulations were performed in a sterile biosafety cabinet. Cellfectin™ II  
656 (ThermoFisher) was employed to transfect 10 µg of bacmid into  $1 \times 10^6$  attached Sf9 cells following  
657 manufacturer's protocols (ThermoFisher). P1 virus was harvested 3 days post-transfection. 1 mL of  
658 P1 virus was then used to infect 20 mL of Sf9 cells grown in suspension at  $1.5 \times 10^6$  cells per mL,  
659 which were maintained in a dark orbital shaker at 27 °C. Cells were centrifuged and supernatant  
660 (P2 virus) was collected once cell viability dropped to 50%, as measured by trypan blue staining.  
661 P3 virus was generated by infecting 50 mL of Sf9 cells at  $1.5 \times 10^6$  cells per mL with 0.5 mL of P2

662 virus. P3 virus was harvested once cells reached 50% viability. Protein production was achieved by  
663 treating 2 L of Sf9 cells at  $2.0 \times 10^6$  cells per mL with 20 mL of P3 virus for 48 h.

664  
665 For PARP1, cells were harvested by centrifugation and disrupted via sonication in a lysis buffer  
666 containing 50 mM Tris, pH 7.5, 1 M NaCl, 1 mM  $MgCl_2$ , 5 mM beta-mercaptoethanol ( $\beta$ -ME), and  
667 protease inhibitor cocktail (Roche). Soluble lysate was isolated via centrifugation at 100,000 RCF  
668 for 60 minutes at 4 °C. The target protein was captured on Ni-NTA resin that was pre-equilibrated  
669 in lysis buffer. Following 1-hour batch binding, resin was washed with 50 column volumes (CV) of  
670 lysis buffer supplemented with 25 mM imidazole and eluted in a buffer containing 50 mM Tris, pH  
671 7.0, 100 mM NaCl, 1.5 mM  $MgCl_2$ , and 5 mM  $\beta$ -ME. Target protein was then loaded onto a HiTrap  
672 Heparin (GE Healthcare) column pre-equilibrated in a low salt buffer (50 mM Tris, pH 7.0, 150 mM  
673 NaCl, 1 mM EDTA, 1 mM TCEP) and elution was achieved via an isocratic salt gradient to a high  
674 salt buffer (50 mM Tris, pH 7.0, 1 M NaCl, 1 mM EDTA, 1 mM TCEP). Fractions containing the  
675 target protein were concentrated to 2 mL using an Amicon Ultra Centrifugal filter (Millipore; 30 kDa  
676 molecular weight cut-off (MWCO)) and injected into a gel filtration column (HiLoad 16/60 Superdex  
677 200; GE Healthcare) that had been pre-equilibrated with a buffer containing 50 mM Tris, pH 7.5,  
678 150 mM NaCl, 10% glycerol, and 1 mM TCEP. Pure fractions (as judged by SDS-PAGE) were  
679 pooled and concentrated to 100  $\mu$ M, flash frozen in single-use aliquots, and stored at -80 °C.

680  
681 For PARP2, cells were harvested by centrifugation and disrupted via sonication in a lysis buffer  
682 containing 20 mM Tris, pH 7.9, 500 mM NaCl, 4 mM  $MgCl_2$ , 0.4mM EDTA, 20% glycerol, 2mM  
683 DTT, 0.4mM PMSF, and protease inhibitor cocktail (Roche). Soluble lysate was isolated via  
684 centrifugation at 100,000 RCF for 60 minutes at 4 °C. The supernatant was carefully removed  
685 without disturbing the top layer and an equal volume of dilution buffer containing 20 mM Tris, pH  
686 7.9, 10% glycerol, 0.02% NP-40 and protease inhibitor cocktail (Roche) was added to it. The target

687 protein was captured on anti-FLAG M2 magnetic resin that was pre-equilibrated with dilution  
688 buffer. Following a 60 min batch binding, resin was washed with 50 CV of wash buffer containing  
689 20 mM Tris, pH 7.9, 150 mM NaCl, 2 mM MgCl<sub>2</sub>, 0.2 mM EDTA, 15% glycerol, 0.01% NP-40, 0.2  
690 mM PMSF, 1 mM DTT and protease inhibitor cocktail (Roche), and eluted in the wash buffer  
691 supplemented with FLAG peptide at a concentration of 0.25 mg/mL. Pure protein was  
692 concentrated using an Amicon Ultra Centrifugal filter (Millipore; 30 kDa MWCO) to around 55 µM,  
693 as determined by BSA standards in SDS-PAGE, flash frozen in single-use aliquots, and stored at -  
694 80 °C.

695

#### 696 *HPF1 (and HPF1D283A mutant)*

697 A pET30 plasmid harboring the 6xHis-SUMO-FLAG-HPF1 protein (addgene plasmid #: 111577),  
698 encoding amino acids 27-346, was transformed into Rosetta2 (DE3) cells and inoculated into 6 L  
699 of Luria Broth (Miller). Cells were grown in a shaker at 37 °C up to an OD<sub>600</sub> of 0.6 and protein  
700 expression was induced with 0.5 mM IPTG at 18 °C for 16 h. Cells were harvested by  
701 centrifugation and disrupted via sonication in a lysis buffer containing 50 mM Tris, pH 7.5, 500 mM  
702 NaCl, 5 mM β-ME and 1 mM PMSF. Soluble lysate was isolated via centrifugation at 40,000 RCF  
703 for 40 minutes at 4 °C. Target protein was captured on Ni-NTA resin that was pre-equilibrated in  
704 lysis buffer. Following 1 h batch binding at 4 °C, resin was washed with 50 CV of lysis buffer  
705 supplemented with 25 mM imidazole and protein was eluted in lysis buffer supplemented with 300  
706 mM imidazole. The elution was dialyzed into a buffer containing 50 mM Tris, pH 7.5, 200 mM NaCl,  
707 and 5 mM TCEP for 16 h at 4 °C in the presence of the Ulp1 protease to cleave the SUMO tag.  
708 The dialysate was then incubated with Ni-NTA resin pre-washed with the dialysis buffer for 1 h at 4  
709 °C to capture the cleaved SUMO tag and the Ulp1, and the flow-through containing the target  
710 protein was collected. The flow-through was concentrated to 2 mL using an Amicon Ultra  
711 Centrifugal filter (Millipore; 30 kDa MWCO) and injected into a gel filtration column (HiLoad 16/60

712 Superdex 200) that had been pre-equilibrated with a buffer containing 50 mM Tris, pH 7.5, 200 mM  
713 NaCl, 10% glycerol, and 2 mM TCEP. Pure fractions (as judged by SDS-PAGE) were concentrated  
714 to around 600  $\mu$ M, flash frozen in single-use aliquots, and stored at -80 °C. The HPF1D283A  
715 bacterial expression plasmid was generated via inverse PCR from the parent pET30 plasmid  
716 containing the HPF1 construct and transformed into Rosetta2 (DE3) cells. It was purified in the  
717 same way as described for HPF1.

### 718 *ARH3*

719 *ARH3*  
720 A pET30 plasmid harboring the 6xHis-SUMO-ARH3 protein (addgene plasmid #: 111578) was  
721 transformed into Rosetta2 (DE3) cells and inoculated into 6 L of Luria Broth (Miller). Protein  
722 expression was induced with 0.5 mM IPTG at a cell OD<sub>600</sub> of 0.6. Expression was carried out at 18  
723 °C for 16 h. Cells were harvested by centrifugation and protein was purified using Ni-NTA resin  
724 followed by reverse nickel and size-exclusion chromatography (SEC) in a manner similar to that  
725 described for HPF1. Pure fractions from the SEC (as judged by SDS-PAGE) were concentrated to  
726 around 600  $\mu$ M, flash frozen in single-use aliquots, and stored at -80 °C.

### 727 *PARG*

728 *PARG*  
729 A PARG gene fragment encoding amino acids 448-976 was synthesized by Integrated DNA  
730 Technologies and cloned into a modified pET30 vector via Gibson Assembly to produce an *E. coli*  
731 expression plasmid for the 6xHis-SUMO-PARG construct. The plasmid was transformed into  
732 Rosetta2 (DE3) cells and inoculated into 2 L of Luria Broth (Miller). Protein expression was induced  
733 with 0.5 mM IPTG at a cell OD<sub>600</sub> of 0.6, and carried out at 18 °C for 16 h. Cells were harvested by  
734 centrifugation and protein was purified using Ni-NTA resin followed by reverse nickel and size-  
735 exclusion chromatography (SEC) in a manner similar to that described for HPF1. Pure fractions

736 from the SEC (as judged by SDS-PAGE) were concentrated to around 300  $\mu$ M, flash frozen in  
737 single-use aliquots, and stored at -80 °C.

738

### 739 *ALC1* macrodomain

740 The full-length *ALC1* gene was synthesized by Twist Biosciences. A fragment encoding amino  
741 acids 636-878, corresponding to the macrodomain(Singh et al., 2017), was cloned into a modified  
742 pET30 vector via Gibson Assembly to produce an *E. coli* expression plasmid for the 6xHis-SUMO-  
743 *ALC1*macrodomain construct. The plasmid was transformed into Rosetta2 (DE3) cells and  
744 inoculated into 6 L of Luria Broth (Miller). Protein expression was induced with 0.5 mM IPTG at a  
745 cell OD<sub>600</sub> of 0.6. Expression was carried out at 18 °C for 16 h. Cells were harvested by  
746 centrifugation and disrupted via sonication in a lysis buffer containing 50 mM Tris, pH 7.5, 500 mM  
747 NaCl, 5 mM  $\beta$ -ME and 1 mM PMSF. Soluble lysate was isolated via centrifugation at 40,000 RCF  
748 for 30 minutes at 4 °C. Target protein was captured on Ni-NTA resin that was pre-equilibrated in  
749 lysis buffer. Following 1 h batch binding, resin was washed with 50 CV of lysis buffer  
750 supplemented with 25mM imidazole, and then 2 CV of lysis buffer supplemented with 80 mM  
751 imidazole, and target protein was eluted in lysis buffer supplemented with 300 mM imidazole. The  
752 elution was dialyzed into a buffer containing 50 mM Tris, pH 7.5, 200 mM NaCl, and 5 mM TCEP  
753 for 16 h at 4 °C in the presence of Ulp1 to cleave the SUMO tag. The dialysate was then incubated  
754 with Ni-NTA resin pre-washed with the dialysis buffer for 1 h at 4 °C to capture the cleaved SUMO  
755 tag and the Ulp1, and the flow-through containing the target protein was collected. The flow-  
756 through was concentrated to 2 mL using an Amicon Ultra Centrifugal filter (Millipore; 30 kDa  
757 MWCO) and injected into a gel filtration column (HiLoad 16/60 Superdex 200) that had been pre-  
758 equilibrated with a buffer containing 40 mM Tris, pH 7.5, 200 mM NaCl, 10% glycerol, and 2 mM  
759 TCEP. Pure fractions (as judged by SDS-PAGE) were concentrated to around 400  $\mu$ M, flash  
760 frozen in single-use aliquots, and stored at -80 °C.

761

762 *ALC1*

763 The full-length ALC1 gene was cloned into a modified pACEBac1 vector via Gibson Assembly to  
764 produce the 6xHis-1xFLAG-ALC1 DNA construct. Bacmid and baculovirus preparation was  
765 performed as described for PARP1/2. Protein expression was achieved by treating 2 L of Sf9 cells  
766 at  $2.0 \times 10^6$  cells per mL with 20 mL of P3 virus for 48 h. Cells were harvested by centrifugation and  
767 target protein was purified using anti-FLAG M2 magnetic resin in a procedure similar to that  
768 described for PARP2. Pure protein was concentrated using an Amicon Ultra Centrifugal filter  
769 (Millipore; 30 kDa MWCO) to around 20  $\mu$ M, as determined by BSA standards in SDS-PAGE, flash  
770 frozen in single-use aliquots, and stored at -80 °C.

771

772 *CHD4*

773 The full-length CHD4 gene was purchased from Horizon Discovery and cloned into a modified  
774 pACEBac1 vector via Gibson Assembly to produce the CHD4-1xFLAG DNA construct. Bacmid and  
775 baculovirus preparation was performed as described for PARP1/2. Protein production was  
776 achieved by treating 2 L of Sf9 cells at  $2.0 \times 10^6$  cells per mL with 20 mL of P3 virus for 48 h. Cells  
777 were harvested by centrifugation and target protein was purified using anti-FLAG M2 magnetic  
778 resin in a procedure similar to that described for PARP2. Pure protein was concentrated using an  
779 Amicon Ultra Centrifugal filter (Millipore; 30 kDa MWCO) to around 20  $\mu$ M, as determined by BSA  
780 standards in SDS-PAGE, flash frozen in single-use aliquots, and stored at -80 °C.

781

782 *Auto-ADP-ribosylated PARP1 (serine-linked)*

783 The PARP1 purified by the above method was incubated in auto-ADP-ribosylation reactions with  
784 NAD<sup>+</sup> and activating DNA. An HPF1 titration experiment was employed to identify two  
785 concentrations at which relatively short or long serine-linked ADP-ribose chains could be installed

786 on PARP1. Reactions (5 mL) included 2  $\mu$ M of purified recombinant PARP1, 5  $\mu$ M of activating  
787 DNA, and 250  $\mu$ M of NAD<sup>+</sup> and were incubated in a buffer containing 50 mM Tris (pH 7.5), 20 mM  
788 NaCl, 2 mM MgCl<sub>2</sub>, 1 mM TCEP with either 5  $\mu$ M or 25  $\mu$ M HPF1 for 30 min at 30 °C. The reaction  
789 with 5  $\mu$ M HPF1 yielded PARP1 automodified with long serine-linked ADP-ribose chains and that  
790 with 25  $\mu$ M HPF1 yielded PARP1 automodified with short serine-linked ADP-ribose chains. After  
791 completion of the automodification reaction, the sample was injected onto a 5 mL Cytiva HiTrap  
792 Heparin column (GE) that was pre-equilibrated with low salt buffer (150 mM NaCl, 50 mM Tris pH  
793 7.5, 2 mM  $\beta$ Me, 1 mM MgCl<sub>2</sub>). The column was washed with 5 CV of low salt buffer and the protein  
794 was eluted using a gradient from the low salt buffer to a high salt buffer (1 M NaCl, 50 mM Tris pH  
795 7.5, 2 mM  $\beta$ Me, 1 mM MgCl<sub>2</sub>) over 20 CV at a flow rate of 3 mL/min. Fractions were analysed on  
796 SDS-PAGE and those containing pure protein were pooled, concentrated to around 20  $\mu$ M,  
797 supplemented with 10% glycerol, flash-frozen into single-use aliquots and stored in -80 °C.

798

### 799 *Core histones (H2A, H2B, H3, H4)*

800 Identical purification protocols were employed for each full-length histone. Expression plasmids  
801 were transformed into Rosetta2 (DE3) cells and inoculated into 1 L of Luria Broth (Miller). Protein  
802 expression was induced with 0.5 mM IPTG at a cell OD<sub>600</sub> of 0.6. Expression was carried out at 37  
803 °C for 3 h. Cells were harvested by centrifugation and disrupted via sonication in a lysis buffer  
804 containing 40 mM Tris, pH 7.5, 0.3 M NaCl, 1 mM EDTA, 5 mM  $\beta$ -ME, and 1 mM PMSF. Following  
805 centrifugation at 20,000 RCF for 30 minutes at 4 °C, the inclusion body pellet was then washed  
806 with lysis buffer supplemented with 1% Triton X-100 and centrifuged at 20,000 RCF for 15 min.  
807 This wash was repeated two more times with the final wash being performed in the absence of  
808 Triton X-100. Next, recombinant histone protein was extracted from the insoluble pellet in a buffer  
809 containing 50 mM Tris, 7.5, 300 mM NaCl, 6 M guanidine hydrochloride, and 5 mM  $\beta$ -ME for 1 hour  
810 at 25 °C and centrifuged at 20,000 RCF for 30 min. The soluble extract was then centrifuged at

811 100,000 RCF, injected onto a preparative C18 RP-HPLC column equilibrated in Solvent A (0.1%  
812 TFA in water) and eluted via an isocratic gradient 20–80% Solvent B (90% acetonitrile, 0.1% TFA  
813 in water) over a period of 30 min. Pure fractions (as determined by LC–MS) were lyophilized and  
814 stored at –80 °C until use in histone octamer assembly.

815

### 816 *H2B (amino acids 17-125) and H3 (amino acids 21-135)*

817 Identical protocols were employed for each truncated 6xHis-ketosteroid isomerase-SUMO-tagged  
818 histone. The ketosteroid isomerase tag (synthesized by IDT and incorporated into histone  
819 expression plasmids via Gibson Assembly) rapidly shuttles truncated histones to *E. coli* inclusion  
820 bodies to protect them from degradation and increase yield. Truncated histones were expressed  
821 and extracted as described for full-length histone constructs. Following extraction, the histones  
822 were immobilized on Ni-affinity resin in extraction buffer, washed with 50 mM Tris, pH 7.5, 300 mM  
823 NaCl, 6 M guanidine hydrochloride, 20 mM imidazole, and 5 mM β-ME, and eluted in wash buffer  
824 supplemented with 300 mM imidazole. The eluted protein was dialyzed for 16 h at 4 °C into dialysis  
825 buffer (50 mM Tris, pH 7.5, 300 mM NaCl, 6 M urea, and 5 mM β-ME). Following dialysis, the  
826 sample was diluted three-fold with dilution buffer (50 mM Tris, pH 7.5, 300 mM NaCl, and 5 mM β-  
827 ME) in the presence of Ulp1 to cleave the ketosteroid isomerase-SUMO tag. This target proteins  
828 were then purified via preparative RP-HPLC and stored as described for full-length histone  
829 constructs.

830

### 831 *601 DNA preparation*

832 The 200 bp template used to assemble all nucleosomes is shown below with the 601 sequence in  
833 bold, the PstI site in yellow, and the overhangs underlined:

834



835 5'–GGCCGCTCTAGAACTAGTGGATCCGATATCGCTGTTACCCGCGTGACAGGATGTATATAT  
836 **CTGACACGTGCCTGGAGACTAGGGAGTAATCCCCTTGGCGGTAAAACGCGGGGGACAGC**  
837 **GCGTACGTGCGTTTAAGCGGTGCTAGAGCTGTCTACGACCAATTGAGCGGCTGCAGCACCG**  
838 **GGATTCTCCAGCATCAGAG**-3'

839

840 The 601 sequence was purchased from IDT and incorporated into a pET30a plasmid via Gibson  
841 Assembly. DNA was amplified from the parent plasmid using Phusion polymerase and the primers  
842 shown in the Supplementary Table 4. The PCR product was purified using QIAquick Spin Columns  
843 (Qiagen) following manufacturer's protocols. Following elution, an ethanol precipitation step was  
844 performed and DNA was resuspended to 1 µg/µL in water for use in nucleosome assembly.

845

846 To insert unique 5' primer-binding sites for the nucleosome competition remodeling assays,  
847 primers bearing unique 5' 15 bp overhangs were employed in the protocol described above. Primer  
848 sequences are shown in the Supplementary Table 4. The final template design is outlined below  
849 with the 601 sequence in bold, the PstI site in yellow, the unique 5' primer-binding site in teal, and  
850 the universal 3' primer-binding site in gray:

851

852 5'–nnnnnnnnnnnnnnnnnnnnAGTGGATCCGATATCGCTGTTACCCGCGTG**ACAGGATGTATATATCTG**  
853 **ACACGTGCCTGGAGACTAGGGAGTAATCCCCTTGGCGGTAAAACGCGGGGGACAGCGCG**  
854 **TACGTGCGTTTAAGCGGTGCTAGAGCTGTCTACGACCAATTGAGCGGCTGCAGCACCGGGA**  
855 **TTCTCCAGCATCAGAG**-3'

856

## 857 Peptide synthesis

### 858 *General protocols*

859 All fluorenylmethyloxycarbonyl (Fmoc)-protected amino acids were purchased from Oakwood  
860 Chemical or Combi-Blocks. Peptide synthesis resins (Trityl-OH ChemMatrix and Rink Amide  
861 ChemMatrix) were purchased from Biotage. All analytical reversed-phase HPLC (RP-HPLC) was  
862 performed on an Agilent 1260 series instrument equipped with a quaternary pump and an XBridge  
863 Peptide C18 column (5  $\mu$ m, 4  $\times$  150 mm; Waters) at a flow rate of 1 mL/min. Similarly, semi-  
864 preparative scale purifications were performed employing a XBridge Peptide C18 semi-preparative  
865 column (5  $\mu$ m, 10 mm  $\times$  250 mm, Waters) at a flow rate of 4 mL/min. Preparative RP-HPLC was  
866 performed on an Agilent 1260 series instrument equipped with a preparatory pump and a XBridge  
867 Peptide C18 preparatory column (10  $\mu$ M; 19  $\times$  250 mm, Waters) at a flow rate of 20 mL/min. All  
868 instruments were equipped with a variable wavelength UV-detector. All RP-HPLC steps were  
869 performed using 0.1% (trifluoroacetic acid, TFA, Oakwood Chemical) in H<sub>2</sub>O (Solvent A) and 90%  
870 acetonitrile (Sigma-Aldrich), 0.1% TFA in H<sub>2</sub>O (Solvent B) as mobile phases. For LC/MS analysis,  
871 0.1% formic acid (Sigma-Aldrich) was substituted for TFA in mobile phases. Gradients and run  
872 times are described in the characterization section for each molecule. Mass analysis was carried  
873 out for each product on an LC/MSD (Agilent Technologies) equipped with a 300SB-C18 column  
874 (3.5  $\mu$ M; 4.6  $\times$  100 mm, Agilent Technologies) or a X500B QTOF (Sciex).

875

### 876 *Preparation of amidated peptides*

877 Sequence of H3 (1-20)-CONH<sub>2</sub>: **ARTKQTARKSTGGKAPRKQL-CONH<sub>2</sub>**

878 Sequence of H3S10A (1-20)-CONH<sub>2</sub>: **ARTKQTARKATGGKAPRKQL-CONH<sub>2</sub>**

879 Sequence of H2B (1-16)-CONH<sub>2</sub>: **PEPAKSAPAPKKGSKK-CONH<sub>2</sub>**

880 Sequence of H2BS6A (1-16)-CONH<sub>2</sub>: **PEPAKAAPAPKKGSKK-CONH<sub>2</sub>**

881 Sequence of PARP1 (501-515)- CONH<sub>2</sub>: **AALSKKSKGQVKEEG-CONH<sub>2</sub>**

882 Sequence of PARP1S507A (501-515)- CONH<sub>2</sub>: **AALSKKAKGQVKEEG-CONH<sub>2</sub>**

883 Sequence of TMA16 (2-19)- CONH<sub>2</sub>: **PKAPKKGKSAGREKKVIHP-CONH<sub>2</sub>**

884 Sequence of TMA16S9A (2-19)- CONH<sub>2</sub>: **PKAPKGKAAGREKKVIHP-CONH<sub>2</sub>**

885

886 The above amidated peptides were synthesized via solid-phase peptide synthesis on a CEM  
887 Discover Microwave Peptide Synthesizer (Matthews, NC) using the Fmoc-protection strategy on  
888 Rink Amide-ChemMatrix resin (0.5 mmol/g). For coupling reactions, amino acids (5 eq) were  
889 activated with N,N'-diisopropylcarbodiimide (DIC, 5 eq, Oakwood Chemical)/Oxyma (5 eq,  
890 Oakwood Chemical) and heated to 90 °C for 2 min while bubbling with nitrogen gas in N,N-  
891 dimethylformamide (DMF, Oakwood Chemical). Fmoc deprotection was carried out with 20%  
892 piperidine (Sigma-Aldrich) in DMF supplemented with 0.1 M 1-hydroxybenzotriazole hydrate  
893 (HOBt, Oakwood Chemical) at 90 °C for 1 minute while bubbling with nitrogen gas. The H3  
894 Cleavage from the resin was performed with 92.5% TFA, 2.5% triisopropylsilane (TIS, Sigma-  
895 Aldrich), 2.5% 1,2-ethanedithiol (EDT, Sigma-Aldrich), and 2.5% H<sub>2</sub>O for 2 h at 25 °C. The crude  
896 peptide was then precipitated by the addition of a 10-fold volume of cold ether and centrifuged at  
897 4,000 RCF for 10 min at 4 °C. The pellet was resuspended in Solvent A and purified via  
898 preparative RP-HPLC using a linear gradient from 0-30% Solvent B over 30 minutes. Fractions  
899 were analyzed on analytical RP-HPLC and ESI-MS and those containing pure product (>95%)  
900 were pooled, lyophilized, and stored at -80 °C.

901

902 *Fluorescein-labeled H3.1 (1-20)-CONH<sub>2</sub>, H2B (1-16)-CONH<sub>2</sub>*

903 Peptides were synthesized as described for the amidated species. Prior to cleavage, 5(6)-  
904 carboxyfluorescein (3 eq, Sigma-Aldrich) was activated with PyAOP (3 eq, Oakwood Chemical)  
905 and N,N-diisopropylethylamine (DIPEA, 6 eq, Sigma-Aldrich) and coupled to the deprotected α-  
906 amine on resin for 30 minutes at 25 °C in DMF while bubbling with nitrogen gas. Resin was  
907 washed with DMF and treated with 20% piperidine in DMF prior to cleavage with 92.5% TFA, 2.5%  
908 TIS, 2.5% EDT, and 2.5% H<sub>2</sub>O for 2 h at 25 °C. The crude peptide was then precipitated by the

909 addition of a 10-fold volume of cold ether and centrifuged at 4,000 RCF for 10 min at 4 °C. The  
910 pellet was resuspended in Solvent A and purified via preparative RP-HPLC using a linear gradient  
911 from 0-50% Solvent B over 40 minutes. Fractions were analyzed on analytical RP-HPLC and ESI-  
912 MS and those containing pure product (>95%) were pooled, lyophilized, and stored at -80 °C.

913

914 *Synthesis of H3.1 (1-20) -NHNH<sub>2</sub>, H2B (1-16) - NHNH<sub>2</sub>*

915 Sequence of H3.1 (1-20) -NHNH<sub>2</sub>: **ARTKQTARKSTGGKAPRKQL-NHNH<sub>2</sub>**

916 Sequence of H2B (1-16) -NHNH<sub>2</sub>: **PEPAKSAPAPKKGSKK-NHNH<sub>2</sub>**

917

918 H3 (1-20) and H2B (1-16) containing C-terminal hydrazide were synthesized similarly to the  
919 amidated peptides described above with the following modifications. ChemMatrix Trityl-OH PEG  
920 resin (0.49 mmol/g) was washed with dichloromethane (DCM, Oakwood Chemical) and reacted  
921 with 5% (v/v) thionyl chloride (Sigma-Aldrich) in DCM for 90 minutes at 25 °C. Resin was washed  
922 with DCM and this step was repeated to ensure efficient resin chlorination. Next, the resin was  
923 washed with DCM, DMF, and 5% (v/v) DIPEA in DMF. The resin was reacted with 9-  
924 fluorenylmethyl carbazate (Combi-Blocks) in the presence of DIPEA (20 eq) in DMF for 2 hr at RT.  
925 The resin was washed with DMF and the 9-fluorenylmethyl carbazate coupling step was repeated  
926 to ensure complete loading. The resin was washed with DMF and 5% (v/v) anhydrous methanol  
927 (Sigma-Aldrich) in DMF. For coupling reactions, amino acids (5 eq) were activated with DIC (5 eq)  
928 and Oxyma (5 eq) and heated to 50 °C for 10 min while bubbling with nitrogen gas in DMF. Fmoc  
929 deprotection was carried out with 20% piperidine in DMF supplemented with 0.1 M HOBt at 60 °C  
930 for 4 minutes while bubbling with nitrogen gas. Cleavage and purification were performed as  
931 described for amidated peptides.

932

933 For peptide thioesterification, purified peptides containing C-terminal hydrazide were dissolved in a  
934 de-gassed buffer of 6 M guanidine hydrochloride and 0.1 M sodium phosphate, pH 3.0. The  
935 reaction was initiated by adding sodium nitrite (15 eq, Sigma-Aldrich) at -15 °C 10 minutes. The pH  
936 was monitored and maintained at 3.0 throughout the reaction. Immediately following this reaction,  
937 MESNa (75 eq, Sigma-Aldrich) and TCEP (final concentration of 20 mM, GoldBio) were added and  
938 the pH was adjusted to 7.0. The mixture was incubated at 25 °C for additional 30 min and  
939 monitored by RP-HPLC and ESI-MS analyses. Once quantitative conversion was complete, the  
940 peptide was purified via preparative RP-HPLC with a linear gradient of 0-30% Solvent B over 30  
941 min. Pure fractions were characterized as described for amidated peptides, pooled, lyophilized,  
942 and stored at -80 °C.

943

944 *Synthesis of H3 (21-34)-SEA, H3 (21-34, S28A)-SEA*

945 Sequence of H3 (21-34)- SEA: Thz-**TKAARKSAPATGG**-SEA

946 Sequence of H3S28A (21-34)- SEA: Thz-**TKAARKAAPATGG**-SEA

947 where,

948 Thz = thiazolidine, and SEA = bis(2-sulfanylethyl)amido group

949 H3 (amino acids 21-34) and the corresponding S28A mutant peptides containing N-terminal  
950 thiazolidine and C-terminal SEA were synthesized similarly to the amidated peptides described  
951 above with the following modifications. SEA resin (0.16 mmol/g; Iris Biotech) was weighed out,  
952 washed with DMF and bubbled in nitrogen for 15 min to swell the resin. Fmoc-glycine (5 eq) and  
953 HATU (1-Bis(dimethylamino)methylene-1H-1,2,3-triazolo [4,5-b]pyridinium 3-oxide  
954 hexafluorophosphate; 5 eq), and DIPEA (15 eq) were mixed in DMF and the resin was bubbled in  
955 this mixture for 1 h. This step was repeated with fresh reagents to ensure complete loading. The  
956 resin was then washed with DMF and bubbled in acetic anhydride:DIPEA:DMF (10:5:85) for 20 min  
957 for acetyl capping. For coupling reactions, amino acids (5 eq) were activated with DIC (5 eq) and

958 Oxyma (5 eq) and heated to 50 °C for 10 min while bubbling with nitrogen gas in DMF. Fmoc  
959 deprotection was carried out with 20% piperidine in DMF supplemented with 0.1 M HOBt at 60 °C  
960 for 4 minutes while bubbling with nitrogen gas. Cleavage and purification were performed as  
961 described for amidated peptides. The use of thiazolidine offers a way to keep the thiol of the N-  
962 terminal cysteine protected while performing native chemical ligation on the C-terminus of the  
963 peptide.

964

## 965 **Recombinant PARP1:HPF1 complex ADPr activity assays and analysis**

### 966 *General protocols*

967 To analyze PARP1:HPF1 ADPr activity on synthetic peptide substrates, 1 μM PARP1 (or 2 μM for  
968 H2B peptides), 10 μM HPF1, 2 mM NAD<sup>+</sup> (Sigma-Aldrich), and 1 μM stimulating DNA (or 2 μM for  
969 H2B peptides; see Supplementary Table 4 for stimulating DNA sequence information) were  
970 combined into the ADPr reaction buffer (50 mM Tris, pH 7.5, 20 mM NaCl, 2 mM MgCl<sub>2</sub>, 5 mM  
971 TCEP) at a final volume of 25 μL (or 50 μL for H2B peptides). All substrate peptides were initially  
972 analyzed at a concentration of 180 μM (40 μM for H2B peptides). The reaction was then incubated  
973 at 30 °C for 25 min and quenched via addition of Solvent A to a final volume of 120 μL. Reactions  
974 were then centrifuged at 20,000 RCF for 5 min and 100 μL of the supernatant was injected onto an  
975 analytical C18 column for product analysis via RP-HPLC. An elution gradient of 0-35% Solvent B  
976 over 20 min was employed to separate the poly-ADP-ribosylated peptide products. Individual  
977 peaks corresponding to products with mono-, di-, tri-, tetra-, or penta-ADP-ribose were collected  
978 and analyzed by ESI-MS.

979

### 980 *Fluorescent peptide ADPr*

981 Reaction volumes were scaled to 1 mL to obtain sufficient amounts of each purified product for  
982 fluorescence polarization assays. For purification via semi-preparative RP-HPLC, an elution

983 gradient of 5-20% Solvent B over 40 min was employed to optimize separation of the poly-ADP-  
984 ribosylated peptide products. Peaks corresponding to products with mono-, di-, tri-, tetra-, or penta-  
985 ADP-ribose were collected separately, analyzed by ESI-MS, and the pure fractions were pooled,  
986 lyophilized, and stored at -80 °C. The reaction and purified peptides were kept wrapped in  
987 aluminum foil whenever possible. We note that 5(6)-carboxyfluorescein causes peak splitting in  
988 HPLC characterization corresponding to individual fluorescein isomers. This phenomenon was  
989 unique to fluorescein-labeled peptides and peak resolution varied based on ADP-ribose chain  
990 length.

#### 991 *HPF1 titration analysis on unmodified peptide substrates*

992 For the HPF1 titration experiments described in Fig. 1e, reactions were performed as described  
993 above in the presence of 0, 5, 10, 20, 50 or 100  $\mu$ M HPF1. Histone peptide starting material was  
994 quantified via integration of the corresponding HPLC peak at  $A_{214}$ . Peak area was converted to  
995 peptide concentration via a standardization curve that was generated using known quantities of  
996 substrate peptide. ADP-ribosylated peptide products were quantified via integration of  
997 corresponding HPLC peaks at  $A_{280}$ . Peak areas were then converted to peptide concentrations via  
998 a standardization curve that was generated using known quantities of ADP-ribosylated peptides.  
1000 Standardization curves were generated for the mono- and di- ADP-ribosylated products. We note  
1001 that the peptide HPLC  $A_{280}$  signal is dependent upon the ADP-ribose moiety and no  $A_{280}$  signal is  
1002 present for any unmodified peptides used in this study. Therefore, there is a linear relationship  
1003 between product extinction coefficient at 280 nm and the number of ADP-ribose units that are  
1004 attached to the peptide. This linear increase in extinction coefficient was extrapolated to quantify all  
1005 products with chain lengths greater than or equal to di-ADP-ribose. All reactions and  
1006 standardization curve samples were run on the same C18 column and HPLC instrument using

1007 identical mobile phase gradients. All reactions were performed in triplicate and error bars represent  
1008 standard deviations.

1009

1010 The following formula was used to calculate percent conversion to each product in a given  
1011 reaction:

1012

$$1013 \quad \% \text{ conversion} = \left\{ \frac{[ADPr_n]}{[unmodified] + \sum[ADPr_n]} \right\} \times 100$$

1014

1015 In the above formula:

1016 [ADPr<sub>n</sub>] represents the concentration of an individual product modified with mono-, di-, tri-, tetra-, or  
1017 penta-ADP-ribose

1018 [unmodified] represents the concentration of the unmodified peptide starting material

1019  $\sum[ADPr_n]$  represents the sum total concentration of all detectable ADP-ribosylated products

1020

### 1021 *Optimized peptide mono-ADPr preparation*

1022 Optimal yield of mono-ADP-ribosylated peptides was achieved via a reaction of 1  $\mu$ M PARP1 (or 2  
1023  $\mu$ M PARP1 for H2B peptides), 20  $\mu$ M HPF1, 5  $\mu$ M of PARG, 10 mM NAD<sup>+</sup>, 0.5 mM unmodified  
1024 substrate peptide, and 3  $\mu$ M stimulating DNA (or 6  $\mu$ M for H2B peptides) in ADPr reaction buffer.

1025 Reactions were incubated at 30 °C for 30 min and quenched via addition of 6 M guanidine

1026 hydrochloride and 0.1 M sodium phosphate. Purification was carried out on a preparative RP-

1027 HPLC C18 column and characterization by ESI-MS and glycohydrolase treatment was performed.

1028 We have scaled to as high as 15 mL reaction volume and 2 mM substrate peptide. Percent

1029 conversion of peptide starting material drop precipitously at higher substrate peptide

1030 concentrations. Importantly, 5  $\mu$ M of PARG is included throughout this reaction to cleave all poly-



1031 ADP-ribosylated products back to mono-ADP-ribose. We also noticed that PARG enhances  
1032 percent conversion at higher peptide concentrations and is necessary for quantitative conversion  
1033 under the conditions described here. We suspect this is because PARG reverses PARP1 auto-  
1034 poly-ADPr that accumulates throughout the reaction. Notably, auto-ADPr abrogates the  
1035 PARP1:DNA interaction and inactivates the enzyme (Kim et al., 2004). For mono-ADPr of 0.5 mM  
1036 of PARP1 (501-515) or TMA16 (2-19) peptide, 2  $\mu$ M PARP1, 20  $\mu$ M HPF1, 8  $\mu$ M activating DNA, 2  
1037  $\mu$ M PARG, and 10 mM NAD<sup>+</sup> was used. For mono-ADPr of 0.5 mM of H3 (21-34) SEA peptide, 2.5  
1038  $\mu$ M PARP1, 25  $\mu$ M HPF1, 10  $\mu$ M activating DNA, 2  $\mu$ M PARG, and 10 mM NAD<sup>+</sup> was used.

1039

## 1040 **Recombinant PARP1/2 ADPr polymerization activity assays and analysis**

### 1041 *General protocols*

1042 To analyze PARP1 and PARP2 ADPr activity on peptide substrates, 2 mM NAD<sup>+</sup> and 1  $\mu$ M  
1043 stimulating DNA were combined into the ADPr reaction buffer in the presence of 0.2, 1, or 5  $\mu$ M  
1044 PARP1 or PARP2, in a 25  $\mu$ L reaction (2  $\mu$ M PARP1/2, 2  $\mu$ M DNA and 50  $\mu$ L reaction volume for  
1045 H2B peptides). All unmodified and mono-ADP-ribosylated substrate peptides were analyzed at a  
1046 concentration of 180  $\mu$ M (40  $\mu$ M for H2B peptides). The reaction was incubated at 30 °C for 25  
1047 min, quenched via addition of 95  $\mu$ L (70  $\mu$ L in case of H2B peptide reactions) of Solvent A. It was  
1048 then centrifuged at 20,000 RCF for 5 min and 100  $\mu$ L of the supernatant was injected into an  
1049 analytical C18 column for product analysis via RP-HPLC. An elution gradient of 0-35% Solvent B  
1050 over 20 min was employed to optimize separation of the poly-ADP-ribosylated peptide products.  
1051 Percent substrate turnover was calculated by integrating the peaks for the starting material and  
1052 each product on the RP-HPLC A<sub>280</sub> trace, normalizing them depending on their number of ADP-  
1053 ribose moieties, and calculating ratio of total product to total peptide amounts for each reaction. All  
1054 reactions were performed in triplicate and error bars represent standard deviations. Individual

1055 peaks corresponding to products with unique ADP-ribose chain lengths were collected and  
1056 analyzed by ESI-MS.

1057

1058 *HPF1 titration analysis on mono-ADP-ribosylated peptide substrates*

1059 To analyze HPF1-dependent inhibition of PARP1/2 elongation activity, elongation reactions were

1060 performed as described above in the presence of 0, 5, 10, 20, 50 or 100  $\mu$ M of HPF1 or

1061 HPF1D283A, 1  $\mu$ M of PARP1 or PARP2, and 180  $\mu$ M of mono-ADP-ribosylated H3 peptide.

1062 Percent conversion of the mono-ADP-ribosylated peptide substrates to poly-ADP-ribosylated

1063 peptide products was calculated by integrating the peaks for the starting material and each product

1064 on the RP-HPLC A<sub>280</sub> trace. Peak areas were again converted to molar concentrations (as

1065 described in *HPF1 titration analysis on unmodified peptide substrates*).

1066

1067 The following formula was used to calculate fraction elongated in a given reaction:

1068

1069 
$$fraction\ elongated = \frac{\sum[ADPr_{poly}]}{[ADPr_1] + \sum[ADPr_{poly}]}$$

1070

1071 In the above formula:

1072 [ADPr<sub>1</sub>] represents the concentration of the mono-ADP-ribosylated peptide starting material

1073  $\Sigma$ [ADPr<sub>poly</sub>] represents the sum total concentration of all detectable poly-ADP-ribosylated peptide

1074 products (products modified with di-, tri-, tetra-, or penta-ADP-ribose\*)

1075

1076 \*in Fig. 2b and c, the data is represented as the sum total of all poly-ADP-ribosylated peptide

1077 products. For distribution of product species, see Supplementary Fig. 2a, b and e. The relative

1078 fraction elongated at any concentration of HPF1 was calculated as:

1079

1080

$$\text{relative fraction elongated} = \frac{\text{fraction elongated}}{\text{fraction elongated when [HPF1] = 0}}$$

1081

1082

### *Optimized peptide poly-ADPr preparation*

1083

1084

1085

1086

1087

1088

1089

1090

1091

1092

1093

1094

1095

### **Glycohydrolase activity assays**

1096

1097

1098

1099

1100

1101

For histone H3 peptide analysis, ADPr reactions containing 1  $\mu\text{M}$  PARP1, 10  $\mu\text{M}$  HPF1, 2 mM  $\text{NAD}^+$ , and 1  $\mu\text{M}$  stimulating DNA, and 125  $\mu\text{M}$  unmodified H3 peptide were combined into the ADPr reaction buffer at a final volume of 75  $\mu\text{L}$ . Following a 25 min incubation at 30  $^{\circ}\text{C}$ , the reaction was quenched with 10  $\mu\text{M}$  Olaparib (Selleckchem) and 25  $\mu\text{L}$  was removed for pre-glycohydrolase treatment analysis. ARH3 or PARG was then added to a final concentration of 3  $\mu\text{M}$  or 1  $\mu\text{M}$ , respectively, and incubated at 37  $^{\circ}\text{C}$  for 2 h. Pre- and post-glycohydrolase-treated

1102 samples were then analyzed via analytical RP-HPLC on a C18 column using an elution gradient of  
1103 0-35% Solvent B over 20 min. Product identities were verified by ESI-MS.

1104

1105 We note that for H2B, glycohydrolase analysis was performed after the PARP1 elongation reaction  
1106 from the mono-ADP-ribosylated peptide. This is because only very low levels of poly-ADP-  
1107 ribosylated products could be generated in the PARP1:HPF1 reaction. Elongation was much more  
1108 efficient from mono-ADP-ribosylated H2B peptides in reactions that lacked HPF1. For H2B product  
1109 glycohydrolase analysis, peptide ADPr reactions containing 2  $\mu\text{M}$  PARP1, 2 mM  $\text{NAD}^+$ , 180  $\mu\text{M}$   
1110 mono ADP-ribosylated substrate peptide, and 2  $\mu\text{M}$  stimulating DNA were combined into the ADPr  
1111 reaction buffer at a final volume of 150  $\mu\text{L}$ . Following a 25 min incubation at 30  $^\circ\text{C}$ , the reaction  
1112 was quenched with 10  $\mu\text{M}$  Olaparib and 50  $\mu\text{L}$  was removed for pre-glycohydrolase treatment  
1113 analysis. ARH3 or PARG was then added to a final concentration of 3  $\mu\text{M}$  or 1  $\mu\text{M}$ , respectively, to  
1114 50  $\mu\text{L}$  of the elongated reaction and incubated at 37  $^\circ\text{C}$  for 2 h. Pre- and post-glycohydrolase-  
1115 treated samples were then analyzed via analytical RP-HPLC on a C18 column using an elution  
1116 gradient of 0-35% Solvent B over 20 min. Product identities were verified by ESI-MS.

1117

### 1118 **LC-MS/MS analysis of PAR chains on a peptide substrate**

1119 To analyze branching of PAR chains installed on peptide substrates using our technology, we  
1120 utilized the LC-MS/MS-based approach outlined by Chen, et al (Chen et al., 2018). PAR chains  
1121 from a purified tetra-ADP-ribosylated H2B (1-16) peptide were subjected to treatment with Alkaline  
1122 Phosphatase (Sigma-Aldrich) and Phosphodiesterase I (Sigma-Aldrich). ADP-ribosylated peptide  
1123 (80  $\mu\text{M}$ ) was incubated with  $\sim 8$  units of Phosphodiesterase I and  $\sim 300$  units of alkaline  
1124 phosphatase at 30  $^\circ\text{C}$  overnight in a 0.5 mL reaction in a buffer containing 50 mM Tris (pH 7.5), 20  
1125 mM NaCl, 2 mM  $\text{MgCl}_2$ , and 5 mM TCEP. The reaction products were then desalted and  
1126 deproteinized via RP-HPLC (C18 column) and lyophilized. The lyophilized powder containing a

1127 mixture of the digestion products was then resuspended in water to a final concentration of 20  
1128 µg/mL and 12 µL was injected onto Phenomenex Synergi Polar-RP column (150 x 2 mm, 4 µm  
1129 packing) and analyzed by LC-MS/MS using a Sciex QTRAP® 6500+ mass spectrometer coupled  
1130 to a Shimadzu Nexera X2 UPLC. The chromatographic conditions were as follows: Solvent A:  
1131 dH<sub>2</sub>O + 0.2% acetic acid, Solvent B: acetonitrile + 0.2% acetic acid; flow rate: 0.46 mL/min; 0-2 min  
1132 1% B, 2-2.5 min gradient to 78% B, 2.5-3 min 78% B, 3-3.1 min gradient to 80% B, 3.1-3.5 min  
1133 80% B, 3.5-3.6 min gradient to 95% B, 3.6-6 min 95% B, 6.5 min gradient to 1% B, 6.5-7.5 min 1%  
1134 B. Analytes were detected with the mass spectrometer in MRM (multiple reaction monitoring) mode  
1135 by following the precursor to fragment ion transitions as follows: Adenosine 268 → 136 (2.27 min  
1136 retention time), ribosyl-adenosine 400 → 268 and 136 (3.08 min retention time), diribosyl-  
1137 adenosine 532.18 → 400, 268 and 136 (3.5 min retention time). Peaks were integrated and peak  
1138 areas were determined by AB Sciex Analyst 1.71 with HotFix 1 software.

1139

## 1140 **PARP1 pull-down assays**

### 1141 *Immunoprecipitations with PARP1 and HPF1*

1142 A 100 µL solution of 5 µM FLAG-HPF1 (or HPF1D283A), 1 µM PARP1, 10 µM Olaparib, and 10  
1143 µM stimulating DNA in Pull-Down Buffer (50 mM Tris, pH 7.5, 50 mM NaCl, 2 mM MgCl<sub>2</sub>, 0.1%  
1144 Triton X-100, 1 mM DTT) was incubated for 25 min at 25 °C. This solution was then centrifuged at  
1145 20,000 RCF for 10 minutes and the supernatant was added to 10 µL of Anti-FLAG M2 magnetic  
1146 resin (MilliporeSigma; pre-equilibrated in Pull-Down Buffer), after keeping aside 30 µL from the  
1147 reaction as an input control for SDS-PAGE gel analysis. Resin was incubated on an end-over-end  
1148 rotator at 4 °C for 30 min, washed for 3 times for 1 min each with 0.5 mL of Pull-Down Buffer, and  
1149 eluted via incubation in 2X SDS loading dye at 95 °C for 5 min. Samples were analyzed on 10%  
1150 SDS PAGE Bis-Tris gel and imaged via Coomassie Brilliant blue staining on a BioRad ChemiDoc.

1151

1152 *Immunoprecipitations with PARP1, nucleosomes, and ALC1*

1153 A 50  $\mu$ L solution of 100 nM FLAG-ALC1, 50 nM unmodified or H3S10ADPr<sub>3</sub> nucleosomes, and 100  
1154 nM PARP1 (unmodified, PARP1 SerADPr<sub>long</sub>, or PARP1 SerADPr<sub>short</sub>) in IP buffer (100 mM KCl, 25  
1155 mM HEPES pH 7.9, 2 mM MgCl<sub>2</sub>, 5% glycerol, 0.1% NP-40, 1 mM DTT) was incubated at 30 °C  
1156 for 15 min. Binding reactions were then added to anti-FLAG M2 magnetic resin (MilliporeSigma;  
1157 pre-equilibrated in IP Buffer) after keeping aside 5  $\mu$ L as an input control for western blot analysis.  
1158 Resin was incubated on an end-over-end rotator at 4 °C for 1 h, washed for 3 times for 1 min each  
1159 with 0.5 mL of IP Buffer (with very gentle vortexing), and eluted via incubation in 2X SDS loading  
1160 dye at 95 °C for 5 min. Samples were run on 10% SDS PAGE Bis-Tris gels, analyzed via western  
1161 blot and imaged on a BioRad ChemiDoc.

1162

1163 **Fluorescence polarization-based peptide interaction assays**

1164 Each fluorescently-labeled H2B (unmodified, mono-, di-, tri-, and tetra-ADP-ribose at H2BS6) and  
1165 H3 peptide (unmodified, mono-, di-, tri-, tetra-, or penta-ADP-ribose at H3S10) was diluted to 2 nM  
1166 in a buffer containing 25 mM Tris, pH 7.5, 100 mM NaCl, 2 mM MgCl<sub>2</sub>, 0.001% Triton X100, and 1  
1167 mM DTT. Note, H3 elongates more efficiently than H2B and so the penta-ADP-ribosylated species  
1168 could be isolated for this peptide. Peptide concentration was calculated via fluorescein extinction  
1169 coefficient ( $A_{480} = 70,000$ ). To analyze peptide:pan-ADP-ribose detection reagent (Af1521  
1170 macrodomain fused to rabbit Fc tag, MilliporeSigma) interaction, the pan-ADP-ribose detection  
1171 reagent was titrated into each peptide to final concentrations ranging from 0- 2000 nM (points  
1172 represent 3x dilutions starting from 2000 nM; a higher concentration of 4000 nM was also included  
1173 for mono- and di-ADP-ribosylated peptides). To analyze peptide:ALC1-macrodomain interaction,  
1174 the ALC1-macrodomain was titrated into each peptide to final concentrations ranging from 0- 3000  
1175 nM (points represent 3x dilutions starting from 3000 nM). Reactions were added to a black, flat-  
1176 bottom 96-well plate (Corning Costar) and analyzed on a BioTek Cytation 5 imager equipped with

1177 a Green FP filter set (excitation: 485 nm, emission: 528 nm). Polarization values were converted to  
1178 anisotropy using the following formula:  $r=(2P/(3-P))$  (Lakowicz, 2006). Following background  
1179 subtraction and normalization, data was then processed in GraphPad Prism using a non-linear  
1180 regression analysis to obtain  $K_{d, app}$  values for each peptide:protein interaction. Error bars  
1181 represent standard deviation value from three biological replicates.

1182

### 1183 **Assembly of full-length, ADP-ribosylated histones**

1184 Native chemical ligation reactions were performed by combining modified histone peptides bearing  
1185 C-terminal MESNa moieties (H2BS6ADPr<sub>1</sub>, H2BS6ADPr<sub>3</sub>, H2BS6ADPr<sub>4</sub>, H3S10ADPr<sub>1</sub>,  
1186 H3S10ADPr<sub>3</sub>, or H3S10ADPr<sub>4</sub>) with their corresponding recombinant C-terminal histone fragments  
1187 (H2BA17C 17-125 or H3A21C 21-135). A typical reaction included 1 mM histone thioester peptide,  
1188 0.5 mM recombinant histone fragment, 20 mM TCEP, and 150 mM 2,2,2-trifluoroethanethiol  
1189 (Sigma-Aldrich) in a degassed buffer of 6 M guanidine hydrochloride and 0.1 M sodium phosphate  
1190 at pH 7.0. Reactions were incubated at 37 °C for 16 h and progress was monitored via RP-HPLC  
1191 and ESI-MS analysis. Full-length histone products were purified on a semi-preparative C18 RP-  
1192 HPLC column using a gradient from 10-80% Solvent B over 40 minutes. Fractions were analyzed  
1193 via analytical C18 RP-HPLC and ESI-MS and those greater than 95% pure were pooled,  
1194 lyophilized, and stored at -80 °C until use. We note that all H2B and H3 histones have an alanine  
1195 to cysteine mutation at the respective ligation junction (H2BA17C and H3A21C). We have since  
1196 optimized desulfurization protocols to convert this cysteine back to the native alanine residue  
1197 without affecting the ADP-ribose moiety. Desulfurization will be employed in future applications of  
1198 this method.

1199

### 1200 **Preparation of histone octamers**

1201 Octamers and nucleosomes were prepared as previously described (Luger et al., 1999) with  
1202 several modifications. Lyophilized recombinant and semi-synthetic histones were dissolved in a  
1203 buffer containing 6 M guanidine hydrochloride, 20 mM Tris, pH 7.6, and 5 mM DTT at 4 °C. H2A,  
1204 H2B, H3, and H4 were combined at a ratio of 1.2:1.2:1.0:1.0, respectively, and diluted to a final  
1205 concentration of 1 mg/mL of total histone. The histone mixture was then injected into a Slide-A-  
1206 Lyzer MINI dialysis cassette (3.5 kDa MWCO, ThermoFisher) and dialyzed at 4 °C into Octamer  
1207 Refolding Buffer (10 mM Tris, pH 7.6, 2 M NaCl, 1 mM EDTA, and 1 mM DTT) for 20 h. The  
1208 cassette was placed into fresh Octamer Refolding Buffer at the 4 h and 16 h time-points during the  
1209 dialysis. Next, the histone octamer solution was purified via gel filtration (Superdex 200 Increase  
1210 10/300 GL; GE Healthcare) that had been pre-equilibrated with Octamer Refolding Buffer. Injection  
1211 volume did not exceed 0.5 mL to ensure efficient separation of histone octamers from sub-octamer  
1212 species. Fractions containing the octamer complex (as judged by FPLC elution chromatogram and  
1213 SDS-PAGE gel electrophoresis) were concentrated to 50 µM as quantified by  $A_{280}$  for unmodified  
1214 nucleosomes (extinction coefficient = 44,700) or  $A_{260}$  for ADP-ribosylated nucleosomes (extinction  
1215 coefficient = 13,500 x total ADP-ribose units), diluted two-fold with glycerol, and stored at a final  
1216 concentration of 25 µM at -20 °C prior to nucleosome assembly. The following unique octamers  
1217 were assembled for nucleosome preparation: unmodified, H2BS6ADPr<sub>1</sub>, H2BS6ADPr<sub>3</sub>,  
1218 H2BS6ADPr<sub>4</sub>, H3S10ADPr<sub>1</sub>, H3S10ADPr<sub>3</sub>, H3S10ADPr<sub>4</sub>, H2BS6/H3S10ADPr<sub>3</sub>,  
1219 H2BS6/H3S10ADPr<sub>4</sub>.

1220

### 1221 **Nucleosome assembly and characterization**

1222 Nucleosomes were assembled by combining 150 pmol histone octamer with 180 pmol 601 DNA in  
1223 75 µL of a buffer containing 2 M KCl, 10 mM Tris, pH 7.5, 0.1 mM EDTA, 1 mM DTT at 4 °C. The  
1224 mixture was then injected into a Slide-A-Lyzer MINI dialysis button (3.5 kDa MWCO,  
1225 ThermoFisher) and dialyzed against a buffer of 10 mM Tris, pH 7.0, 1.4 M KCl, 0.1 mM EDTA, 1



1226 mM DTT at 4 °C for 1 h. Next, 350 mL of Nucleosome End Buffer (10 mM Tris, pH 7.5, 10 mM KCl,  
1227 0.1 mM EDTA, 1 mM DTT) was added at a rate of 1 mL/min. After 12 h, the cassette was dialyzed  
1228 against Nucleosome End Buffer for 4 h with a fresh buffer exchange at the 2 h time-point.  
1229 Following dialysis, precipitation was removed via centrifugation at 20,000 RCF for 10 min at 4 °C  
1230 and A<sub>260</sub> of the supernatant was measured to calculate nucleosome concentration. Note that for  
1231 individual remodeling experiments, all nucleosomes were assembled on an identical 601-  
1232 containing 200 bp DNA template. For competition remodeling experiments, each nucleosome was  
1233 assembled on the same 601-containing 200 bp DNA template except the 15 bp at the 5'-end were  
1234 replaced with a unique priming sequence.

1235

1236 Nucleosome quality was analyzed by running the nucleosome on native PAGE on a 5% TBE gel in  
1237 0.5X TBE buffer (BioRad) that was run for 60 min at 150 volts. For gel loading, 10 pmol of  
1238 nucleosome was diluted into 20 µL of Nucleosome End Buffer supplemented with 12% sucrose.  
1239 Gels were stained with ethidium bromide and imaged on a BioRad ChemiDoc and the nucleosome  
1240 band migrates around 500 bp. We noted that nucleosome migration is affected by ADP-ribose  
1241 chain length. If any free 601 DNA was observed on the TBE gel, then a PstI (NEB) restriction  
1242 digestion was performed to check if the free DNA was present in the nucleosome dialysate or was  
1243 an artifact of the gel run. To further verify stability of ADPr throughout the histone octamer and  
1244 nucleosome assembly, 2.5 pmol of nucleosome were run on a 12% SDS-PAGE gel and immuno-  
1245 blot analysis was performed to detect ADP-ribose, H2B, and H3. ADP-ribosylated H2B and H3  
1246 proteins exhibit distinct migration profiles relative to the unmodified species, confirming that they  
1247 are homogenously modified.

1248

1249 **Western blot protocol**

1250 SDS-PAGE gels were transferred to PVDF membranes at 100 volts for 1 h at 4 °C using a wet  
1251 transfer protocol in Towbin Buffer (25 mM Tris, 192 mM glycine, 20% methanol, pH 8.3). Blots  
1252 were then blocked for 1 h at 25 °C with 5% non-fat dry milk (BioRad) in TBST (50 mM Tris, pH 7.5,  
1253 150 mM NaCl, 0.1% Tween20) prior to incubation with primary antibodies for 12 h at 4 °C.  
1254 Following primary antibody binding, blots were washed 3 times for 5 min each with TBST and then  
1255 incubated with the appropriate fluorescent or HRP-conjugated secondary antibody for 1 h at 25 °C.  
1256 Blots were then washed 3 times for a total of 15 min with TBST and imaged on a BioRad  
1257 ChemiDoc. All antibodies used in this study and corresponding dilutions can be found in  
1258 Supplementary Table 5.

1259

### 1260 **Restriction enzyme accessibility-based nucleosome remodeling assay**

1261 REA assays and analysis were performed as previously described (Dann et al., 2017) with several  
1262 modifications. Nucleosome remodeling reactions (25  $\mu$ L) were carried out in REA Buffer (12 mM  
1263 HEPES, pH 7.9, 4 mM Tris, pH 7.5, 60 mM KCl, 10 mM MgCl<sub>2</sub>, 10% glycerol, and 0.02% NP-40)  
1264 including 1  $\mu$ L of PstI (NEB, at 100,000 U/mL), 2 mM ATP (Sigma-Aldrich), and final  
1265 concentrations of 4 nM ALC1 or 10 nM CHD4 and 20 nM of the desired nucleosome substrate.  
1266 The reaction was incubated for 5 min prior to addition of chromatin remodeler to ensure that any  
1267 trace amount of free DNA from the nucleosome assembly was digested prior to initiating the  
1268 reaction. This is required to ensure that free DNA digestion can be assigned as background activity  
1269 and is not interpreted as enzyme-dependent nucleosome remodeling in data processing. To each  
1270 reaction, 37.5  $\mu$ L of Quench Buffer (20 mM Tris, pH 7.5, 70 mM EDTA, pH 8, 2% SDS, 10%  
1271 glycerol) was added at time points of 0, 3, 6, 18, 36, and 60 min. Samples were then deproteinized  
1272 with 30 U/mL proteinase K (NEB) for 1 h at 37 °C. DNA purification was performed using the  
1273 Qiagen PCR purification kit following manufacturer's protocols. Purple Gel Loading Dye (6X, NEB)  
1274 was added to a final concentration of 1X to the quenched reaction and samples were loaded onto

1275 a 5% TBE gel and run for 60 min at 150 volts in 0.5X TBE Buffer (BioRad). Gels were stained with  
1276 ethidium bromide and imaged on a BioRad ChemiDoc. Gel densitometry measurements were  
1277 performed using ImageJ. For each lane, the total densitometry signal was calculated by adding the  
1278 densitometry values corresponding to the PstI-digested species (lower band) and undigested  
1279 species (upper band). The fraction unremodeled value for each lane was then calculated using the  
1280 following formula:

1281

$$1282 \quad \textit{fraction unremodeled} = \frac{\textit{signal}_{undigested}}{\textit{signal}_{undigested} + \textit{signal}_{digested}}$$

1283

1284 For each chromatin remodeling reaction, activity at the zero time point was considered background  
1285 activity (described above) and that value of fraction unremodeled was denoted as the reference for  
1286 normalizing values from other time points in the corresponding reaction. Data was performed in  
1287 biological triplicate and fit into one-phase exponential decay equation in GraphPad Prism to obtain  
1288 the remodeling plots and corresponding k values (Supplementary Table 2), where k denotes the  
1289 rate constant for the exponential decay. For calculation of k values, plateau was constrained to  
1290 zero and  $k > 0$ .

1291

1292 To probe ALC1 activation by freely diffusing ADP-ribosylated peptides, the H3S10ADPr<sub>4</sub> or  
1293 H2BS6ADPr<sub>4</sub> (amino acids 1-20 or 1-16, respectively) peptides were added to the REA Buffer at  
1294 10, 40, or 200 nM. Remodeling reactions were then carried out as described for 1 h on unmodified  
1295 nucleosomes (Supplementary Fig. 5c). Control reactions were also set up with the same  
1296 concentrations of unmodified versions of the corresponding peptides. A full time-course (0, 3, 6,  
1297 18, 36, 60 min) was performed at the 40 nM peptide concentration. This concentration was  
1298 selected for complete analysis (Fig. 5c) because the final ADP-ribose concentration is equivalent

1299 to that of the modified nucleosome assays (20 nM nucleosome x 2 ADP-ribosylated histone tails  
1300 per nucleosome). All reactions and controls were performed in triplicate.

1301

1302 To probe ALC1 activation by Asp-/Glu- auto-ADP-ribosylated PARP1, we added 5, 20, 50, 100, or  
1303 200 nM PARP1 and 2 mM NAD<sup>+</sup> to the remodeling assays. Remodeling reactions were then  
1304 carried out as described for 1 h on unmodified nucleosomes (Supplementary Fig. 5e). A full time-  
1305 course (0, 3, 6, 18, 36, 60 min) was performed at 20 and 100 nM PARP1 concentration in triplicate  
1306 (Supplementary Fig. 5b). These concentrations were selected for complete analysis because the  
1307 stimulatory effect of ADP-ribosylated PARP1 on nucleosome remodeling by ALC1 plateaued at  
1308 around 50 nM. Western blots were performed using the PARP1 antibody and the pan-ADPr-  
1309 detection reagent at time-points 0, 3, 6, 18, 36, and 60 min to quantify conversion of PARP1 in the  
1310 reaction to the auto-ADP-ribosylated species. Similar titrations were carried out for serine-linked  
1311 auto-ADP-ribosylated PARP1 species and the stimulatory effect seemed to plateau around 100nM,  
1312 thus the full time-course (0, 3, 6, 18, 36, 60 min) remodeling experiments were performed at  
1313 100nM serine auto-modified PARP1 concentration (Supplementary Fig. 5g).

1314

### 1315 **Hydroxylamine treatment**

1316 A fresh stock solution of 3.3 M hydroxylamine was prepared in 10 mM Tris in water and adjusted to  
1317 pH ~6 using filtered 5 M KOH. Automodified PARP1 constructs (1 μM) were added to a buffer  
1318 containing 50 mM Tris (pH 7.5), 20 mM NaCl and 2 mM MgCl<sub>2</sub>. Hydroxylamine was added to this  
1319 solution to a final concentration of 0.8 M and the solution was incubated at room temperature for 1  
1320 h. The reaction was quenched using 0.3% HCl. SDS-PAGE loading dye was added to the samples  
1321 at a final concentration of 1X and boiled before being run on an SDS-PAGE gel. The bands on the  
1322 gels were visualized via silver-stain.

1323

## 1324 **Nucleosome remodeling competition assay**

1325 Two nucleosome substrate pools were prepared for the competition assays, with each substrate  
1326 pool containing seven unique species. The first pool (H2B Pool) included H2BS6ADPr<sub>1</sub>,  
1327 H2BS6ADPr<sub>3</sub>, and H2BS6ADPr<sub>4</sub> nucleosomes, each of which contained a unique 5' priming site as  
1328 outlined in the '601 DNA preparation' section above. The second pool (H3 Pool) included  
1329 H3S10ADPr<sub>1</sub>, H3S10ADPr<sub>3</sub>, and H3S10ADPr<sub>4</sub> nucleosomes, each of which contained a unique 5'  
1330 priming site. Each pool also included two unmodified nucleosomes assembled on unique  
1331 templates to serve as internal reproducibility controls. Free DNA templates with the PstI site and an  
1332 unmodified nucleosome without the PstI site were also included as internal controls for PstI activity  
1333 and data normalization, respectively. To ensure that PCR amplification artifacts do not influence  
1334 cycle threshold determination, we selected primer:template pairs with similar primer efficiencies  
1335 (Supplementary Fig. 5h).

1336  
1337 Each nucleosome substrate pool was prepared by combining equal volumes of each nucleosome  
1338 (stock solutions = 250 nM) or free DNA species (stock solutions = 250 nM). Therefore, the total  
1339 species concentration in each assembled substrate pool is 250 nM (~36 nM per species). The final  
1340 total nucleosome species concentration used in remodeling assays was 20 nM. ALC1 was used at  
1341 a concentration of 4 nM for the H2B substrate pool and 8 nM for the H3 substrate pool.

1342 Remodeling assays were carried out, quenched at six different time points (0, 3, 6, 18, 36, 60 min)  
1343 and DNA was isolated as described in the 'Restriction enzyme accessibility-based nucleosome  
1344 remodeling assay' section. Real-time PCR was then performed with each unique primer pair  
1345 according to manufacturer's protocols (iTaQ Universal SYBR Green Supermix, BioRad) to quantify  
1346 undigested (that is, unremodeled) template for each unique species at every time point. Fold-  
1347 decrease in template quantity from  $t = 0$  to  $t = x$  was calculated by determining the  $\Delta\Delta C_t$  for a  
1348 species of interest relative to the unmodified nucleosome lacking the PstI site. Note: the template

1349 lacking PstI site cannot be digested and thus serves as an internal control for  $\Delta\Delta C_t$  calculation.  
1350 Fold-decrease in template quantity was then converted to fraction unremodeled. Each competition  
1351 assay was performed in triplicate and data points take into account an average of three  
1352 independent amplifications for each primer pair (see Supplementary Dataset for primer  
1353 pair:substrate combinations). The data was processed in GraphPad Prism and fit into a one-phase  
1354 exponential decay equation with plateau constrained to zero and  $k > 0$  to obtain the remodeling  
1355 plots and corresponding  $k$  values (Figure 5g, h, and Supplementary Table 3).

1356

### 1357 **Mammalian cell culture**

1358 HEK293T cells (ATCC) were culture in high-glucose DMEM (MilliporeSigma) supplemented with  
1359 10% Fetal Bovine Serum (Gibco), 100 units/mL of penicillin (Sigma), and 100  $\mu\text{g}/\text{mL}$  of  
1360 streptomycin (Sigma). Cells were maintained at 37°C and 5%  $\text{CO}_2$  and passaged/frozen down  
1361 according to manufacturer's protocols (ATCC). Plasmid transfection was accomplished with  
1362 Lipofectamine 2000 according to manufacturer's protocols (Invitrogen).

1363

### 1364 *Generation of ALC1 knockout cell lines*

1365 CRISPR-Cas9 plasmids (pSpCas9(BB)-2A-Puro (PX459) v2.0; Addgene plasmid #: 62988)  
1366 targeting the ALC1 gene (for gRNA targeting sequences, see Supplementary Table 4) were  
1367 transfected into HEK293T cells. Targeting sequences were obtained using the Genetic  
1368 Perturbation Platform (Broad Institute). After 24 h, 2  $\mu\text{g}/\text{mL}$  of puromycin (Sigma) was added to  
1369 growth medium and cells were selected for 48 h. Puromycin was then removed, dead cells were  
1370 washed away, and the adhering live cells were left to recover for 24 h prior to dilution for single  
1371 colony selection. Clones were screened via western blot for ALC1 and those with no detectable  
1372 ALC1 were frozen down and stored in liquid nitrogen.

1373

1374 **Nuclear lysate preparation**

1375 Nuclear lysate was prepared as previously described (Carey et al., 2009) with some modifications.  
1376 The cells were dounced with a B-type pestle (Kontle Glass Co) until they were lysed. Lysis was  
1377 confirmed by staining with Trypan Blue dye and visualizing under a microscope. The cell number  
1378 was estimated using a hemocytometer and the volumes of the different buffers were added  
1379 depending on that. The nuclear lysate was homogenized using pestle B until it was properly  
1380 resuspended in Buffer C. The crude nuclear lysate was dialyzed into Buffer D in a dialysis tubing  
1381 (FisherScientific, 6-8 kDa MWCO) at 4 °C, and dialysis was stopped at first signs of precipitation  
1382 (around 3-4h).

1383

1384 **Nuclear lysate nucleosome remodeling assay**

1385 Nucleosome remodeling reactions (25  $\mu$ L) were carried out in REA Buffer with 1  $\mu$ L of PstI (NEB,  
1386 at 100,000 U/mL), 2 mM ATP, and 8  $\mu$ L of nuclear lysate derived from either wild-type or ALC1  
1387 knockout HEK293T cells and 20 nM of the desired nucleosome substrate. The reactions were  
1388 carried out at 30°C and quenched with Quench Buffer at 0 min and 60 min time points. The 601  
1389 DNA was isolated as described in 'Restriction enzyme accessibility-based nucleosome remodeling  
1390 assay' section and analyzed on a 5% TBE gel. Western blot analyses of the ADPr profile of each  
1391 nucleosome employed in this assay were carried out after incubation with or without either nuclear  
1392 lysate under identical reaction conditions.

1393

1394 **Supplementary Information**

1395

1396 **Supplementary figures 1-6** and **Supplementary Tables 1-5** and (along with accompanying  
1397 legends) are provided as a separate document.

1398

1399 **Supplementary Dataset** contains all peak integration values from ADP-ribosylation assays,  
1400 fluorescence polarization values from peptide-macrodomein interaction assays, densitometry  
1401 values from single-substrate chromatin remodeling assays, and cycle threshold ( $C_t$ ) values from  
1402 multi-substrate chromatin remodeling assays reported in this study.

1403



## 1404 References

- 1405 Aberle, L., Kruger, A., Reber, J.M., Lippmann, M., Hufnagel, M., Schmalz, M., Trussina, I.,  
1406 Schlesiger, S., Zobel, T., Schutz, K., *et al.* (2020). PARP1 catalytic variants reveal branching and  
1407 chain length-specific functions of poly(ADP-ribose) in cellular physiology and stress response.  
1408 *Nucleic Acids Res* **48**, 10015-10033.
- 1409 Ahel, D., Horejsi, Z., Wiechens, N., Polo, S.E., Garcia-Wilson, E., Ahel, I., Flynn, H., Skehel, M.,  
1410 West, S.C., Jackson, S.P., *et al.* (2009). Poly(ADP-ribose)-dependent regulation of DNA repair by  
1411 the chromatin remodeling enzyme ALC1. *Science* **325**, 1240-1243.
- 1412 Benjamin, R.C., and Gill, D.M. (1980). Poly(ADP-ribose) synthesis in vitro programmed by  
1413 damaged DNA. A comparison of DNA molecules containing different types of strand breaks. *J Biol*  
1414 *Chem* **255**, 10502-10508.
- 1415 Bilokapic, S., Suskiewicz, M.J., Ahel, I., and Halic, M. (2020). Bridging of DNA breaks activates  
1416 PARP2-HPF1 to modify chromatin. *Nature* **585**, 609-613.
- 1417 Blessing, C., Mandemaker, I.K., Gonzalez-Leal, C., Preisser, J., Schomburg, A., and Ladurner,  
1418 A.G. (2020). The Oncogenic Helicase ALC1 Regulates PARP Inhibitor Potency by Trapping  
1419 PARP2 at DNA Breaks. *Mol Cell* **80**, 862-875 e866.
- 1420 Bonfiglio, J.J., Fontana, P., Zhang, Q., Colby, T., Gibbs-Seymour, I., Atanassov, I., Bartlett, E.,  
1421 Zaja, R., Ahel, I., and Matic, I. (2017). Serine ADP-Ribosylation Depends on HPF1. *Mol Cell* **65**,  
1422 932-940 e936.
- 1423 Bonfiglio, J.J., Leidecker, O., Dauben, H., Longarini, E.J., Colby, T., San Segundo-Acosta, P.,  
1424 Perez, K.A., and Matic, I. (2020). An HPF1/PARP1-Based Chemical Biology Strategy for Exploring  
1425 ADP-Ribosylation. *Cell* **183**, 1086-1102 e1023.
- 1426 Bowman, G.D., and Poirier, M.G. (2015). Post-translational modifications of histones that influence  
1427 nucleosome dynamics. *Chem Rev* **115**, 2274-2295.
- 1428 Carey, M.F., Peterson, C.L., and Smale, S.T. (2009). Dignam and Roeder nuclear extract  
1429 preparation. *Cold Spring Harb Protoc* **2009**, pdb prot5330.
- 1430 Chen, Q., Kassab, M.A., Dantzer, F., and Yu, X. (2018). PARP2 mediates branched poly ADP-  
1431 ribosylation in response to DNA damage. *Nat Commun* **9**, 3233.
- 1432 Chou, D.M., Adamson, B., Dephoure, N.E., Tan, X., Nottke, A.C., Hurov, K.E., Gygi, S.P.,  
1433 Colaiacovo, M.P., and Elledge, S.J. (2010). A chromatin localization screen reveals poly (ADP  
1434 ribose)-regulated recruitment of the repressive polycomb and NuRD complexes to sites of DNA  
1435 damage. *Proc Natl Acad Sci U S A* **107**, 18475-18480.
- 1436 Clapier, C.R., and Cairns, B.R. (2012). Regulation of ISWI involves inhibitory modules antagonized  
1437 by nucleosomal epitopes. *Nature* **492**, 280-284.
- 1438 Daniels, C.M., Ong, S.E., and Leung, A.K. (2015). The Promise of Proteomics for the Study of  
1439 ADP-Ribosylation. *Mol Cell* **58**, 911-924.
- 1440 Dann, G.P., Liszczak, G.P., Bagert, J.D., Muller, M.M., Nguyen, U.T.T., Wojcik, F., Brown, Z.Z.,  
1441 Bos, J., Panchenko, T., Pihl, R., *et al.* (2017). ISWI chromatin remodellers sense nucleosome  
1442 modifications to determine substrate preference. *Nature* **548**, 607-611.
- 1443 Dawicki-McKenna, J.M., Langelier, M.F., DeNizio, J.E., Riccio, A.A., Cao, C.D., Karch, K.R.,  
1444 McCauley, M., Steffen, J.D., Black, B.E., and Pascal, J.M. (2015). PARP-1 Activation Requires  
1445 Local Unfolding of an Autoinhibitory Domain. *Mol Cell* **60**, 755-768.
- 1446 Fontana, P., Bonfiglio, J.J., Palazzo, L., Bartlett, E., Matic, I., and Ahel, I. (2017). Serine ADP-  
1447 ribosylation reversal by the hydrolase ARH3. *Elife* **6**.
- 1448 Gibbs-Seymour, I., Fontana, P., Rack, J.G.M., and Ahel, I. (2016). HPF1/C4orf27 Is a PARP-1-  
1449 Interacting Protein that Regulates PARP-1 ADP-Ribosylation Activity. *Mol Cell* **62**, 432-442.
- 1450 Gibson, B.A., Conrad, L.B., Huang, D., and Kraus, W.L. (2017). Generation and Characterization  
1451 of Recombinant Antibody-like ADP-Ribose Binding Proteins. *Biochemistry* **56**, 6305-6316.

1452 Gottschalk, A.J., Timinszky, G., Kong, S.E., Jin, J., Cai, Y., Swanson, S.K., Washburn, M.P.,  
1453 Florens, L., Ladurner, A.G., Conaway, J.W., *et al.* (2009). Poly(ADP-ribosyl)ation directs  
1454 recruitment and activation of an ATP-dependent chromatin remodeler. *Proc Natl Acad Sci U S A*  
1455 *106*, 13770-13774.

1456 Gottschalk, A.J., Trivedi, R.D., Conaway, J.W., and Conaway, R.C. (2012). Activation of the SNF2  
1457 family ATPase ALC1 by poly(ADP-ribose) in a stable ALC1.PARP1.nucleosome intermediate. *J*  
1458 *Biol Chem* *287*, 43527-43532.

1459 Gupte, R., Liu, Z., and Kraus, W.L. (2017). PARPs and ADP-ribosylation: recent advances linking  
1460 molecular functions to biological outcomes. *Genes Dev* *31*, 101-126.

1461 Hauk, G., McKnight, J.N., Nodelman, I.M., and Bowman, G.D. (2010). The chromodomains of the  
1462 Chd1 chromatin remodeler regulate DNA access to the ATPase motor. *Mol Cell* *39*, 711-723.

1463 He, X., Fan, H.Y., Narlikar, G.J., and Kingston, R.E. (2006). Human ACF1 alters the remodeling  
1464 strategy of SNF2h. *J Biol Chem* *281*, 28636-28647.

1465 Hein, M.Y., Hubner, N.C., Poser, I., Cox, J., Nagaraj, N., Toyoda, Y., Gak, I.A., Weisswange, I.,  
1466 Mansfeld, J., Buchholz, F., *et al.* (2015). A human interactome in three quantitative dimensions  
1467 organized by stoichiometries and abundances. *Cell* *163*, 712-723.

1468 Huletsky, A., de Murcia, G., Muller, S., Hengartner, M., Menard, L., Lamarre, D., and Poirier, G.G.  
1469 (1989). The effect of poly(ADP-ribosyl)ation on native and H1-depleted chromatin. A role of  
1470 poly(ADP-ribosyl)ation on core nucleosome structure. *J Biol Chem* *264*, 8878-8886.

1471 Juhasz, S., Smith, R., Schauer, T., Spekhardt, D., Mamar, H., Zentout, S., Chapuis, C., Huet, S.,  
1472 and Timinszky, G. (2020). The chromatin remodeler ALC1 underlies resistance to PARP inhibitor  
1473 treatment. *Sci Adv* *6*.

1474 Kim, M.Y., Mauro, S., Gevry, N., Lis, J.T., and Kraus, W.L. (2004). NAD<sup>+</sup>-dependent modulation of  
1475 chromatin structure and transcription by nucleosome binding properties of PARP-1. *Cell* *119*, 803-  
1476 814.

1477 Lakowicz, J.R. (2006). Principles of Fluorescence Spectroscopy (New York, New York: Springer  
1478 Science+Business Media, LLC).

1479 Langelier, M.F., Planck, J.L., Roy, S., and Pascal, J.M. (2012). Structural basis for DNA damage-  
1480 dependent poly(ADP-ribosyl)ation by human PARP-1. *Science* *336*, 728-732.

1481 Larsen, S.C., Hendriks, I.A., Lyon, D., Jensen, L.J., and Nielsen, M.L. (2018). Systems-wide  
1482 Analysis of Serine ADP-Ribosylation Reveals Widespread Occurrence and Site-Specific Overlap  
1483 with Phosphorylation. *Cell Rep* *24*, 2493-2505 e2494.

1484 Lehmann, L.C., Hewitt, G., Aibara, S., Leitner, A., Marklund, E., Maslen, S.L., Maturi, V., Chen, Y.,  
1485 van der Spoel, D., Skehel, J.M., *et al.* (2017). Mechanistic Insights into Autoinhibition of the  
1486 Oncogenic Chromatin Remodeler ALC1. *Mol Cell* *68*, 847-859 e847.

1487 Leidecker, O., Bonfiglio, J.J., Colby, T., Zhang, Q., Atanassov, I., Zaja, R., Palazzo, L., Stockum,  
1488 A., Ahel, I., and Matic, I. (2016). Serine is a new target residue for endogenous ADP-ribosylation  
1489 on histones. *Nat Chem Biol* *12*, 998-1000.

1490 Liszczak, G., Diehl, K.L., Dann, G.P., and Muir, T.W. (2018). Acetylation blocks DNA damage-  
1491 induced chromatin ADP-ribosylation. *Nat Chem Biol* *14*, 837-840.

1492 Lord, C.J., and Ashworth, A. (2017). PARP inhibitors: Synthetic lethality in the clinic. *Science* *355*,  
1493 1152-1158.

1494 Luger, K., Rechsteiner, T.J., and Richmond, T.J. (1999). Preparation of nucleosome core particle  
1495 from recombinant histones. *Methods Enzymol* *304*, 3-19.

1496 Luijsterburg, M.S., de Krijger, I., Wiegant, W.W., Shah, R.G., Smeenk, G., de Groot, A.J.L., Pines,  
1497 A., Vertegaal, A.C.O., Jacobs, J.J.L., Shah, G.M., *et al.* (2016). PARP1 Links CHD2-Mediated  
1498 Chromatin Expansion and H3.3 Deposition to DNA Repair by Non-homologous End-Joining. *Mol*  
1499 *Cell* *61*, 547-562.

1500 Palazzo, L., Leidecker, O., Prokhorova, E., Dauben, H., Matic, I., and Ahel, I. (2018). Serine is the  
1501 major residue for ADP-ribosylation upon DNA damage. *Elife* 7.  
1502 Poirier, G.G., de Murcia, G., Jongstra-Bilen, J., Niedergang, C., and Mandel, P. (1982). Poly(ADP-  
1503 ribosyl)ation of polynucleosomes causes relaxation of chromatin structure. *Proc Natl Acad Sci U S*  
1504 *A* 79, 3423-3427.  
1505 Ray Chaudhuri, A., and Nussenzweig, A. (2017). The multifaceted roles of PARP1 in DNA repair  
1506 and chromatin remodelling. *Nat Rev Mol Cell Biol* 18, 610-621.  
1507 Rudolph, J., Roberts, G., Muthurajan, U.M., and Luger, K. (2021). HPF1 and nucleosomes mediate  
1508 a dramatic switch in activity of PARP1 from polymerase to hydrolase. *Elife* 10.  
1509 Singh, H.R., Nardoza, A.P., Moller, I.R., Knobloch, G., Kistemaker, H.A.V., Hassler, M., Harrer,  
1510 N., Blessing, C., Eustermann, S., Kotthoff, C., *et al.* (2017). A Poly-ADP-Ribose Trigger Releases  
1511 the Auto-Inhibition of a Chromatin Remodeling Oncogene. *Mol Cell* 68, 860-871 e867.  
1512 Slade, D., Dunstan, M.S., Barkauskaite, E., Weston, R., Lafite, P., Dixon, N., Ahel, M., Leys, D.,  
1513 and Ahel, I. (2011). The structure and catalytic mechanism of a poly(ADP-ribose) glycohydrolase.  
1514 *Nature* 477, 616-620.  
1515 Smeenk, G., Wiegant, W.W., Marteiijn, J.A., Luijsterburg, M.S., Sroczynski, N., Costelloe, T.,  
1516 Romeijn, R.J., Pastink, A., Mailand, N., Vermeulen, W., *et al.* (2013). Poly(ADP-ribosyl)ation links  
1517 the chromatin remodeler SMARCA5/SNF2H to RNF168-dependent DNA damage signaling. *J Cell*  
1518 *Sci* 126, 889-903.  
1519 Smith, R., Sellou, H., Chapuis, C., Huet, S., and Timinszky, G. (2018). CHD3 and CHD4  
1520 recruitment and chromatin remodeling activity at DNA breaks is promoted by early poly(ADP-  
1521 ribose)-dependent chromatin relaxation. *Nucleic Acids Res* 46, 6087-6098.  
1522 Suskiewicz, M.J., Zobel, F., Ogden, T.E.H., Fontana, P., Ariza, A., Yang, J.C., Zhu, K., Bracken, L.,  
1523 Hawthorne, W.J., Ahel, D., *et al.* (2020). HPF1 completes the PARP active site for DNA damage-  
1524 induced ADP-ribosylation. *Nature* 579, 598-602.  
1525 Teloni, F., and Altmeyer, M. (2016). Readers of poly(ADP-ribose): designed to be fit for purpose.  
1526 *Nucleic Acids Res* 44, 993-1006.  
1527 Tulin, A., and Spradling, A. (2003). Chromatin loosening by poly(ADP)-ribose polymerase (PARP)  
1528 at *Drosophila* puff loci. *Science* 299, 560-562.  
1529 Verma, P., Zhou, Y., Cao, Z., Deraska, P.V., Deb, M., Arai, E., Li, W., Shao, Y., Puentes, L., Li, Y.,  
1530 *et al.* (2021). ALC1 links chromatin accessibility to PARP inhibitor response in homologous  
1531 recombination-deficient cells. *Nat Cell Biol* 23, 160-171.  
1532 Voorneveld, J., Rack, J.G.M., Ahel, I., Overkleeft, H.S., van der Marel, G.A., and Filippov, D.V.  
1533 (2018). Synthetic alpha- and beta-Ser-ADP-ribosylated Peptides Reveal alpha-Ser-ADPr as the  
1534 Native Epimer. *Org Lett* 20, 4140-4143.  
1535 Zhu, A., Li, X., Bai, L., Zhu, G., Guo, Y., Lin, J., Cui, Y., Tian, G., Zhang, L., Wang, J., *et al.* (2020).  
1536 Biomimetic alpha-selective ribosylation enables two-step modular synthesis of biologically  
1537 important ADP-ribosylated peptides. *Nat Commun* 11, 5600.

1538
